# Supplementary material
Source: PubMed Central journal article supplement (PMC2536657)
Supplement: NIHMS62797-supplement-1File002.pdf [file NIHMS62797-supplement-1File002.pdf]

**SUPPORTING INFORMATION****The synthesis and evaluation of 3-aryloxymethyl-1,2-dimethylindole-4,7-diones as mechanism-based inhibitors of NAD(P)H:quinone oxidoreductase 1 (NQO1) activity**

*Marie A. Colucci, Philip Reigan, David Siegel, Aurélie Chilloux, David Ross  
and Christopher J. Moody*

**Contents**

|                                                                        |                 |
|------------------------------------------------------------------------|-----------------|
| Experimental details for compounds <b>31 – 37</b>                      | Pages S2 – S6   |
| Microanalytical data                                                   | Page S7         |
| Full characterization data for compounds <b>6, 7, 10 – 13, 15 – 29</b> | Pages S8 – S15  |
| HPLC data                                                              | Pages S16 – S33 |
| Growth inhibition (MTT) data for phenols and hydroxypyridines          | Page S34        |

### Methyl 2-azido-3-(2-benzyloxy-4-methoxyphenyl)propenoate **31**

Sodium (4.76 g, 207 mmol) was added to a stirred solution of dry methanol (110 mL). A solution of methyl azidoacetate (23.80 g, 207 mmol), 2-benzyloxy-4-methoxybenzaldehyde **30** (12.53 g, 52 mmol) in dry methanol (14 mL) was slowly added over 1 h to the above solution cooled to -12 °C. The reaction mixture was stirred between -10 °C and 0 °C for 4 h and then at 4 °C for 15 h. The reaction mixture was diluted with water (30 mL), extracted into ethyl acetate (3 × 100 mL) and the combined organic layers washed with water (2 × 50 mL), brine (50 mL), dried (MgSO<sub>4</sub>), filtered and the filtrate evaporated *in vacuo* to give the *title compound* (13.94 g, 79%) as a pale yellow crystalline solid; mp 91 – 93 °C (from ethyl acetate); IR (CHCl<sub>3</sub>/cm<sup>-1</sup>) 2434, 2927, 2126, 1701, 1604, 1570, 1503, 1476, 1436, 1425, 1384, 1283, 1206, 1116, 1038; <sup>1</sup>H NMR (300 MHz; CDCl<sub>3</sub>) δ 8.25 (1 H, d, *J* 8.8, 6-H), 7.46 (1 H, s, ArCH=), 7.46 – 7.30 (5 H, m, ArH), 6.54 (1 H, dd, *J* 8.8, 2.4, 5-H), 6.47 (1 H, d, *J* 2.4, 3-H), 5.12 (2 H, s, CH<sub>2</sub>), 3.87 (3 H, s, OMe), 3.80 (3 H, s, OMe); <sup>13</sup>C NMR (75 MHz; CDCl<sub>3</sub>) δ 164.9 (C), 162.3 (C), 158.8 (C), 137.0 (C), 132.3 (CH), 129.0 (CH), 128.4 (CH), 127.4 (CH), 123.2 (C), 120.1 (CH), 116.1 (C), 105.6 (CH), 100.1 (CH), 70.9 (CH<sub>2</sub>), 55.8 (Me), 53.1 (Me); MS (CI) 312 (MH<sup>+</sup> - N<sub>2</sub>, 100%); Found: MH<sup>+</sup> - N<sub>2</sub>, 312.1224. C<sub>18</sub>H<sub>17</sub>N<sub>3</sub>O<sub>4</sub> - N<sub>2</sub> + H requires 312.1236.

### Methyl 4-benzyloxy-6-methoxyindole-2-carboxylate **32**

A solution of methyl 2-azido-3-(2-benzyloxy-4-methoxyphenyl)propenoate **31** (13.90 g, 41 mmol) in dry xylene (300 mL) was introduced dropwise by means of a pressure equalising dropping funnel to refluxing dry xylene (1000 mL). After complete addition the solution was heated under reflux for a further 3 h. The solvent was removed *in vacuo* and the crude product was purified by chromatography (gradient elution with 10 – 20% ethyl acetate/light petroleum) to give the *title compound* (11.48 g, 90%) as a pale yellow crystalline solid; mp 187 – 188 °C (from ethyl acetate); IR (KBr/cm<sup>-1</sup>) 1324, 1692, 1634, 1587, 1523, 1356, 1281, 1212, 1204; <sup>1</sup>H NMR (300 MHz; CDCl<sub>3</sub>) δ 8.90 (1 H, bs, NH), 7.49 – 7.47 (2 H, m, ArH), 7.43 – 7.31 (4 H, m, ArH), 6.44 (1 H, m, ArH), 6.26 (1 H, d, *J* 1.8, ArH), 5.16 (2 H, s, CH<sub>2</sub>), 3.91 (3 H, s, OMe), 3.82 (3 H, s, OMe); <sup>13</sup>C NMR (75 MHz; CDCl<sub>3</sub>) δ 162.8 (C), 160.6 (C), 154.5 (C), 139.1 (C), 137.2 (C), 129.0 (CH), 128.3 (CH), 127.8 (CH), 125.0 (C), 114.5 (C), 107.6 (CH), 94.3 (CH), 86.8 (CH), 70.3 (CH<sub>2</sub>), 56.0 (Me), 52.2 (Me); MS (CI) 312 (MH<sup>+</sup>, 100%); Found: MH<sup>+</sup>, 312.1248.

$C_{18}H_{17}NO_4 + H$  requires 312.1236. (Found C, 68.76; H, 5.49; N, 4.62.  $C_{18}H_{17}NO_4$  requires C, 69.44; H, 5.50; N, 4.50%).

#### 4-Benzyloxy-6-methoxy-2-methylindole **33**

A solution of methyl 4-benzyloxy-6-methoxyindole-2-carboxylate **32** (0.91 g, 2.9 mmol) in dry dioxane (8 mL) was added dropwise with stirring to an ice cooled suspension of lithium aluminium hydride (1.11 g, 29.3 mmol) in dry dioxane (39 mL). The reaction mixture was then heated under reflux for 20 h. The reaction mixture was cooled to 0 °C and quenched by the addition of water (1 mL) and sodium hydroxide (2 M; 1 mL). The reaction mixture was stirred at room temperature for 30 min and then water (3 mL) was added and the granular precipitate formed was filtered through a pad of Celite and the filtrate evaporated *in vacuo*. The crude product was purified by chromatography (gradient elution with 10 – 20% ethyl acetate/light petroleum) to give the *title compound* (469 mg, 60%) as a colorless crystalline solid; mp 113 – 114 °C (chloroform/light petroleum); IR (KBr/cm<sup>-1</sup>) 3414, 2915, 1629, 1599, 1555, 1509, 1451, 1384, 1369, 1333, 1240, 1160, 1116; <sup>1</sup>H NMR (400 MHz; CDCl<sub>3</sub>)  $\delta$  7.74 (1 H, bs, NH), 7.51 – 7.49 (2 H, m, ArH), 7.42 – 7.33 (3 H, m, ArH), 6.40 (1 H, m, ArH), 6.30 – 6.29 (2 H, m, ArH), 5.18 (2 H, s, CH<sub>2</sub>), 3.80 (3 H, s, OMe), 2.37 (3 H, s, Me); <sup>13</sup>C NMR (100 MHz; CDCl<sub>3</sub>)  $\delta$  159.6 (C), 152.0 (C), 137.5 (C), 137.3 (C), 132.0 (C), 128.5 (CH), 127.8 (CH), 127.4 (CH), 114.0 (C), 97.5 (CH), 92.8 (CH), 87.2 (CH), 69.9 (CH<sub>2</sub>), 55.7 (Me), 13.6 (Me); MS (EI) 267 (M<sup>+</sup>, 52%), 176 (100), 91 (22), 133 (20); Found: M<sup>+</sup>, 267.1267.  $C_{17}H_{17}NO_2$  requires 267.1259.

#### 4-Benzyloxy-6-methoxy-2-methylindole-3-carbaldehyde **34**

To a stirred solution of 4-benzyloxy-6-methoxy-2-methylindole **33** (0.90 g, 3.4 mmol) in DMF (1 mL) at -5 °C in a salt/ice bath was added dropwise an ice-cold solution of phosphoryl chloride (314  $\mu$ l, 3.4 mmol) in DMF (0.85 mL). The reaction mixture was stirred between -5 °C and 0 °C for 1 h and then allowed to warm to room temperature. The mixture was dissolved in ice/water (10 mL) and the solution made strongly alkaline with sodium hydroxide (10%). After stirring for 30 min at room temperature, the precipitate formed was extracted into ethyl acetate (3  $\times$  50 mL). The combined ethyl acetate layers were washed with water (25 mL), brine (20 mL), dried (MgSO<sub>4</sub>) and filtered. The solvent was removed *in vacuo* to give the *title compound* (0.89 g, 90 %) as a colorless crystalline solid; mp 227 – 228 °C (from ethyl acetate); IR (KBr/cm<sup>-1</sup>) 3437,

3188, 1628, 1588, 1542, 1458, 1384, 1371, 1333, 1303, 1201, 1190, 1150;  $^1\text{H}$  NMR (300 MHz;  $\text{CDCl}_3$ )  $\delta$  10.48 (1 H, s, CHO), 8.49 (1 H, br s, NH), 7.48 – 7.45 (2 H, m, ArH), 7.42 – 7.31 (3 H, m, ArH), 6.50 (1 H, d,  $J$  1.8, ArH), 6.45 (1 H, d,  $J$  1.8, ArH), 5.20 (2 H, s,  $\text{CH}_2$ ), 3.82 (3 H, s, OMe), 2.74 (3 H, s, Me);  $^{13}\text{C}$  NMR (100 MHz;  $\text{DMSO-}d$ )  $\delta$  186.8 (CH), 156.7 (C), 152.4 (C), 141.7 (C), 137.0 (C), 136.3 (C), 128.5 (CH), 127.8 (CH), 127.5 (CH), 113.6 (C), 110.9 (C), 94.6 (CH), 87.9 (CH), 69.4 ( $\text{CH}_2$ ), 55.3 (Me), 13.8 (Me); MS (EI) 295 ( $\text{M}^+$ , 27%), 204 (100), 91 (87); Found:  $\text{M}^+$ , 295.1216.  $\text{C}_{18}\text{H}_{17}\text{NO}_3$  requires 295.1208. (Found C, 72.81; H, 5.78; N, 4.72.  $\text{C}_{18}\text{H}_{17}\text{NO}_3$  requires C, 73.20; H, 5.80; N, 4.74%).

#### 4-Benzyloxy-6-methoxy-1,2-dimethylindole-3-carbaldehyde 35

To a stirred suspension of potassium hydride (30% in oil; 169 mg, 4.2 mmol) in dry DMF (5.5 mL) at 0 °C was added dropwise a solution of 4-benzyloxy-6-methoxy-2-methylindole-3-carbaldehyde **34** (830 mg, 2.8 mmol) in dry DMF (3.60 mL). The reaction mixture was stirred at room temperature for 45 min. Iodomethane (0.20 mL, 3.2 mmol) was added dropwise at 0 °C and the mixture allowed to warm to room temperature for 18 h. The reaction mixture was quenched with saturated ammonium chloride solution (20 mL), extracted into ethyl acetate (3  $\times$  50 mL). The combined organic layers were washed with water (2  $\times$  25 mL), dried ( $\text{MgSO}_4$ ), filtered and the filtrate evaporated *in vacuo* to give the *title compound* (812 mg, 93%) as a beige crystalline solid; mp 160 – 162 °C (from ethyl acetate); IR (KBr/ $\text{cm}^{-1}$ ) 3436, 1649, 1618, 1525, 1467, 1442, 1395, 1377, 1151;  $^1\text{H}$  NMR (300 MHz;  $\text{CDCl}_3$ )  $\delta$  10.56 (1 H, s, CHO), 7.48 – 7.45 (2 H, m, ArH), 7.42 – 7.33 (3 H, m, ArH), 6.47 (1 H, d,  $J$  1.8, ArH), 6.44 (1 H, d,  $J$  1.8, ArH), 5.20 (2 H, s,  $\text{CH}_2$ ), 3.87 (3 H, s, Me), 3.65 (3 H, s, Me), 2.78 (3 H, s, Me);  $^{13}\text{C}$  NMR (75 MHz;  $\text{CDCl}_3$ )  $\delta$  189.4 (CH), 157.8 (C), 153.8 (C), 143.0 (C), 138.7 (C), 137.0 (C), 129.1 (CH), 128.5 (CH), 127.9 (CH), 114.9 (C), 111.6 (C), 95.3 (CH), 86.7 (CH), 70.7 ( $\text{CH}_2$ ), 56.2 (Me), 30.0 (Me), 12.7 (Me); MS (CI) 310 ( $\text{MH}^+$ , 100%), 38 (282), 27 (219); Found:  $\text{MH}^+$ , 310.1441,  $\text{C}_{19}\text{H}_{19}\text{NO}_3 + \text{H}$  requires 310.1443.

#### 4-Hydroxy-6-methoxy-1,2-dimethylindole-3-carbaldehyde 36

To a solution of 4-benzyloxy-6-methoxy-1,2-dimethylindole-3-carbaldehyde **35** (0.60 g, 1.9 mmol) in THF (30 mL) was added palladium on carbon (10%; 0.06 g). The mixture was stirred under a hydrogen atmosphere for 48 h. The reaction mixture was filtered through Celite and the

filtrate evaporated *in vacuo*. The crude product was purified by chromatography (50% ethyl acetate/light petroleum) to give the *title compound* (0.42 g, 80%) as a yellow crystalline solid; mp 135 – 137 °C (from ethyl acetate/hexane); IR (KBr/cm<sup>-1</sup>) 3436, 2923, 2848, 1642, 1609, 1475, 1443, 1406, 1372, 1346, 1250, 1203, 1133; <sup>1</sup>H NMR (300 MHz; CDCl<sub>3</sub>)  $\delta$  11.06 (1 H, s, OH), 9.63 (1 H, s, CHO), 6.39 (1 H, d, *J* 2.0, ArH), 6.26 (1 H, d, *J* 2.0, ArH), 3.83 (3 H, s, Me), 3.61 (3 H, s, Me), 2.63 (3 H, s, Me); <sup>13</sup>C NMR (75 MHz; CDCl<sub>3</sub>)  $\delta$  184.4 (CH), 160.0 (C), 152.8 (C), 149.1 (C), 140.1 (C), 116.0 (C), 108.8 (CH), 97.1 (CH), 86.2 (CH), 56.1 (Me), 30.5 (Me), 11.2 (Me); MS (CI) 220 (MH<sup>+</sup>, 100%); Found: MH<sup>+</sup>, 220.0965. C<sub>12</sub>H<sub>13</sub>NO<sub>3</sub> + H requires 220.0974.

### 3-Hydroxymethyl-6-methoxy-1,2-dimethylindole-4,7-dione 37

*N,N*-Bis(salicylidene)ethyleneiminocobalt(II) (0.12 g, 0.37 mmol) was added to a stirred solution of 6-methoxy-1,2-dimethylindole-3-carbaldehyde **36** (0.08 g, 0.37 mmol) in DMF (19 mL). The reaction mixture was stirred for 2 h at room temperature. The solvent was removed *in vacuo* and the crude product dissolved in dichloromethane (100 mL), washed with water (2  $\times$  20 mL), dried (MgSO<sub>4</sub>), filtered and concentrated *in vacuo*. The crude product was taken through to the next step without further purification.

Sodium borohydride (0.087 g, 2.30 mmol), was added to a stirred solution of the above 3-formyl-6-methoxy-1-methylindole-4,7-dione in anhydrous methanol (19 mL). The solution was stirred under nitrogen at room temperature for 2 h. Acetone (0.9 mL) followed by aqueous FeCl<sub>3</sub> (1 M; 0.45 mL) in HCl (0.1 M; 0.45 mL) was added. The reaction mixture was immediately extracted with dichloromethane (3  $\times$  50 mL). The combined extracts were washed with water (20 mL), brine (20 mL), dried (MgSO<sub>4</sub>), filtered and the filtrate evaporated *in vacuo*. The crude product was purified by chromatography (elution with 50% ethyl acetate/light petroleum) to give the *title compound* (0.05 g, 58%) as a red crystalline solid; mp 197 – 199 °C (from dichloromethane/light petroleum); UV (MeCN/nm)  $\epsilon_{\text{max}}$  228 (log  $\epsilon$  4.14), 287 (4.13), 295 (4.11), 353 (3.61), 456 (3.16); IR (KBr/cm<sup>-1</sup>) 3378, 3046, 2944, 1662, 1638, 1621, 1597, 1502, 1487, 1464, 1339, 1216; <sup>1</sup>H NMR (300 MHz; MeOH-*d*)  $\delta$  5.74 (1 H, s, 5-H), 4.71 (2 H, s, CH<sub>2</sub>), 3.93 (3 H, s, Me), 3.84 (3 H, s, Me), 2.32 (3 H, s, Me); <sup>13</sup>C NMR (75 MHz; CDCl<sub>3</sub>)  $\delta$  185.6 (C), 170.9 (C), 160.5 (C), 136.7 (C), 127.4 (C), 124.8 (C), 123.3 (C), 106.0 (CH), 56.7 (Me), 56.0 (CH<sub>2</sub>), 32.6 (Me), 9.8 (Me);

MS (FI) 235 ( $M^+$ , 100%); Found:  $M^+$ , 235.0847.  $C_{12}H_{13}NO_4$  requires 235.0845; (Found C, 60.96; H, 5.54; N, 5.93.  $C_{12}H_{13}NO_4$  requires C, 61.27; H, 5.57; N, 5.95%).

### CHN Microanalytical data on compounds for biological evaluation

| Compound  |                                                                                                                |
|-----------|----------------------------------------------------------------------------------------------------------------|
| <b>1</b>  | known compound                                                                                                 |
| <b>5</b>  | known compound                                                                                                 |
| <b>6</b>  | See HPLC                                                                                                       |
| <b>7</b>  | See HPLC                                                                                                       |
| <b>8</b>  | known compound                                                                                                 |
| <b>9</b>  | known compound                                                                                                 |
| <b>10</b> | Found: C, 58.98; H, 3.72; N, 3.65. $C_{18}H_{14}F_3NO_4$ requires C, 59.18; H, 3.86; N, 3.83%                  |
| <b>11</b> | See HPLC data                                                                                                  |
| <b>12</b> | See HPLC data                                                                                                  |
| <b>13</b> | See HPLC data                                                                                                  |
| <b>14</b> | known compound                                                                                                 |
| <b>15</b> | Found: C, 60.11; H, 4.57; N, 7.57. $C_{18}H_{16}N_2O_6$ requires C, 60.67; H, 4.53; N, 7.86%<br>See HPLC data  |
| <b>16</b> | See HPLC data                                                                                                  |
| <b>17</b> | See HPLC data                                                                                                  |
| <b>18</b> | Found: C, 59.99; H, 4.53; N, 7.57. $C_{18}H_{16}N_2O_6$ requires C, 60.67; H, 4.53; N, 7.86%<br>See HPLC data  |
| <b>19</b> | Found: C, 60.07; H, 4.43; N, 7.81. $C_{18}H_{16}N_2O_6$ requires C, 60.67; H, 4.53; N, 7.86%<br>See HPLC data  |
| <b>20</b> | Found: C, 53.43; H, 4.00; N, 9.75. $C_{18}H_{15}N_3O_8$ requires C, 53.87; H, 3.77; N, 10.47%<br>See HPLC data |
| <b>21</b> | Found: C, 57.45; H, 4.15; N, 6.92. $C_{18}H_{17}FN_2O_6$ requires C, 57.46; H, 4.15; N, 7.44%<br>See HPLC data |
| <b>22</b> | Found: C, 66.67; H, 4.81; N, 8.00. $C_{19}H_{16}N_2O_4$ requires C, 67.85; H, 4.79; N, 8.33%<br>See HPLC data  |
| <b>23</b> | Found: C, 59.98; H, 4.29; N, 3.69. $C_{19}H_{16}F_3NO_4$ requires C, 60.16; H, 4.25; N, 3.69%                  |
| <b>24</b> | See HPLC data                                                                                                  |
| <b>25</b> | Found: C, 62.02; H, 4.35; N, 4.01. $C_{18}H_{15}F_2NO_4$ requires C, 62.25; H, 4.35; N, 4.03%                  |
| <b>26</b> | Found: C, 59.09; H, 3.87; N, 3.77. $C_{18}H_{14}F_3NO_4$ requires C, 59.18; H, 3.86; N, 3.83%                  |
| <b>27</b> | Found: C, 62.00; H, 5.08; N, 8.64. $C_{17}H_{16}N_2O_4$ requires C, 65.38; H, 5.16; N, 8.97%<br>See HPLC data  |
| <b>28</b> | See HPLC data                                                                                                  |
| <b>29</b> | See HPLC data                                                                                                  |

**5-Methoxy-1,2-dimethyl-3-(3-nitrophenoxymethyl)indole-4,7-dione 6**

mp 219 – 227 °C; UV (MeCN/nm)  $\epsilon_{\text{max}}$  223 (log  $\epsilon$  3.54), 280 (3.43), 290 (3.42), 333 (2.84), 448 (2.33); IR (CHCl<sub>3</sub>/cm<sup>-1</sup>) 2962, 2357, 1674, 1640, 1457, 1352, 1094; <sup>1</sup>H NMR (400 MHz; CDCl<sub>3</sub>)  $\delta$  7.82 (2 H, m, ArH), 7.43 (1 H, t, *J* 8.4, ArH), 7.29 (1 H, m, ArH), 5.64 (1 H, s, 6-H), 5.36 (2 H, s, CH<sub>2</sub>), 3.91 (3 H, s, Me), 3.82 (3 H, s, Me), 2.32 (3 H, s, Me); <sup>13</sup>C NMR (100 MHz; CDCl<sub>3</sub>)  $\delta$  178.8 (C), 178.2 (C), 160.0 (C), 159.1 (C), 149.2 (C), 138.0 (C), 130.0 (CH), 129.0 (C), 121.6 (CH), 121.4 (C), 115.9 (overlapping CH and C), 109.9 (CH), 106.8 (CH), 61.1 (CH<sub>2</sub>), 56.5 (Me), 32.4 (Me), 9.9 (Me); MS (ESI) 379 (M+Na<sup>+</sup>, 100%), 218 (71); Found: M+Na<sup>+</sup>, 379.0902. C<sub>18</sub>H<sub>16</sub>N<sub>2</sub>O<sub>6</sub> + Na requires 379.0906.

**5-Methoxy-1,2-dimethyl-3-(2-nitrophenoxymethyl)indole-4,7-dione 7**

mp 204 – 205 °C; UV (MeCN/nm)  $\epsilon_{\text{max}}$  218 (log  $\epsilon$  4.52), 281 (4.37), 290 (4.38), 331 (3.82), 450 (3.32); IR (CHCl<sub>3</sub>/cm<sup>-1</sup>) 2978, 2957, 2413, 1641, 1446, 1250, 1095, 999; <sup>1</sup>H NMR (400 MHz; CDCl<sub>3</sub>)  $\delta$  7.78 (1 H, dd, *J* 1.6, 8.0, ArH); 7.50 (1 H, dt, *J* 1.2, 8.4, ArH), 7.41 (1 H, dd, *J* 0.6, 8.4, ArH), 7.00 (1 H, dt, *J* 0.6, 8.0, ArH), 5.63 (1 H, s, 6-H), 5.50 (2 H, s, CH<sub>2</sub>), 3.89 (3 H, s, Me), 3.82 (3 H, s, Me), 2.26 (3 H, s, Me); <sup>13</sup>C NMR (100 MHz; CDCl<sub>3</sub>)  $\delta$  178.6 (C), 178.5 (C), 159.5 (C), 151.6 (C), 140.5 (C), 139.0 (C), 134.2 (CH), 128.7 (C), 125.4 (CH), 121.2 (C), 120.7 (CH), 116.4 (CH), 115.9 (C), 106.8 (CH), 62.1 (CH<sub>2</sub>), 56.2 (Me), 32.4 (Me), 9.9 (Me); MS (ESI) 379 (M+Na<sup>+</sup>, 100); Found: M+Na<sup>+</sup>, 379.0883. C<sub>18</sub>H<sub>16</sub>N<sub>2</sub>O<sub>6</sub> + Na requires 379.0906.

**5-Methoxy-1,2-dimethyl-3-(2,4,6-trifluorophenoxymethyl)indole-4,7-dione 10**

mp 201 – 202 °C; UV (MeCN/nm)  $\epsilon_{\text{max}}$  223 (log  $\epsilon$  4.49), 281 (4.29), 289 (4.28), 338 (3.52), 451 (3.22); IR (CHCl<sub>3</sub>/cm<sup>-1</sup>) 2961, 1638, 1463, 1262, 1092, 869; <sup>1</sup>H NMR (400 MHz; CDCl<sub>3</sub>)  $\delta$  6.67 (2 H, t, *J* 8.0, ArH), 5.62 (1 H, s, 6-H), 5.33 (2 H, s, CH<sub>2</sub>), 3.93 (3 H, s, Me), 3.81 (3 H, s, Me), 2.35 (3 H, s, Me); <sup>13</sup>C NMR (100 MHz; CDCl<sub>3</sub>)  $\delta$  177.8 (C), 176.7 (C), 156.3 (dt, *J*<sub>CF</sub> 245, 14, CF), 155.5 (ddd, *J*<sub>CF</sub> 250, 14, 8, CF), 155.0 (C), 137.9 (C), 130.8 (td, *J*<sub>CF</sub> 14, 6, C), 127.7 (C), 120.5 (C), 115.2 (C), 105.6 (C), 99.5 (ddd, *J*<sub>CF</sub> 27, 27, 8, CH), 64.9 (CH<sub>2</sub>), 55.4 (Me), 31.4 (Me), 8.5 (Me); MS (ESI) 388 (M+Na<sup>+</sup>, 100%), 363 (4); Found: M+Na<sup>+</sup>, 388.0773. C<sub>18</sub>H<sub>14</sub>F<sub>3</sub>NO<sub>4</sub> + Na requires 388.0773.

**5-Methoxy-1,2-dimethyl-3-(pyridin-2-yloxymethyl)indole-4,7-dione 11**



mp 138 – 140 °C; UV (MeCN/nm)  $\lambda_{\text{max}}$  220 (log  $\epsilon$  4.32), 280 (4.25), 290 (4.24), 332 (3.49), 450 (3.21); IR (CHCl<sub>3</sub>/cm<sup>-1</sup>) 2963, 1736, 1675, 1639, 1463, 1263, 1096; <sup>1</sup>H NMR (400 MHz; CDCl<sub>3</sub>)  $\delta$  8.18 (1 H, ddd, *J* 0.8, 2.0, 5.2, PyrH), 7.54 (1 H, ddd, *J* 2.0, 7.2, 8.4, PyrH), 6.86 (1 H, ddd, *J* 0.8, 5.2, 6.8, PyrH), 6.72 (1 H, dt, *J* 0.8, 8.4, PyrH), 5.61 (1 H, s, 6-H), 5.51 (2 H, s, CH<sub>2</sub>), 3.90 (3 H, s, Me), 3.81 (3 H, s, Me), 2.32 (3 H, s, Me); <sup>13</sup>C NMR (100 MHz; CDCl<sub>3</sub>)  $\delta$  178.9 (C), 177.7 (C), 163.7 (C), 159.8 (C), 146.8 (C), 138.5 (CH), 138.0 (CH), 121.9 (C), 117.2 (2 C), 116.8 (CH), 111.2 (CH), 106.6 (CH), 58.0 (CH<sub>2</sub>), 56.4 (Me), 32.4 (Me), 9.7 (Me); MS (ESI) 335 (M+Na<sup>+</sup>, 100%), 218 (82); Found: M+Na<sup>+</sup>, 335.1002. C<sub>17</sub>H<sub>16</sub>N<sub>2</sub>O<sub>4</sub> + Na requires 335.1008.

### 5-methoxy-1,2-dimethyl-3-(2-pyridon-1-ylmethyl)indole-4,7-dione

mp 226 – 232 °C; UV (MeCN/nm)  $\lambda_{\text{max}}$  229 (log  $\epsilon$  4.13), 283 (4.04), 291 (4.07), 456 (3.00); IR (CHCl<sub>3</sub>/cm<sup>-1</sup>) 2963, 1656, 1640, 1583, 1461, 1263, 1096; <sup>1</sup>H NMR (400 MHz; CDCl<sub>3</sub>)  $\delta$  7.95 (1 H, dd, *J* 2.0, 6.8, PyrH), 7.26 (1 H, ddd, *J* 2.0, 6.4, 8.8, PyrH), 6.50 (1 H, d, *J* 8.8, PyrH), 6.10 (1 H, td, *J* 1.2, 6.8, PyrH), 5.62 (1 H, s, 6-H), 5.22 (2 H, s, CH<sub>2</sub>), 3.88 (3 H, s, Me), 3.82 (3 H, s, Me), 2.47 (3 H, s, Me); <sup>13</sup>C NMR (100 MHz; CDCl<sub>3</sub>)  $\delta$  177.5 (2 C), 158.5 (C), 138.6 (CH), 138.4 (C), 138.3 (CH), 131.2 (C), 128.1 (C), 120.4 (CH), 119.5 (C), 115.2 (C), 105.8 (CH), 104.9 (CH), 55.5 (Me), 41.4 (CH<sub>2</sub>), 31.6 (Me), 9.1 (Me); MS (ESI) 335 (M+Na<sup>+</sup>, 100%), 218 (50); Found: M+Na<sup>+</sup>, 335.1006. C<sub>17</sub>H<sub>16</sub>N<sub>2</sub>O<sub>4</sub> + Na requires 335.1008.

### 5-Methoxy-1,2-dimethyl-3-(3-pyridyloxymethyl)indole-4,7-dione 12

mp 158 – 162 °C; UV (MeCN/nm)  $\lambda_{\text{max}}$  223 (log  $\epsilon$  4.27), 280 (4.21), 288 (4.17), 337 (3.45); IR (CHCl<sub>3</sub>/cm<sup>-1</sup>) 2963, 1673, 1640, 1576, 1463, 1092; <sup>1</sup>H NMR (400 MHz; CDCl<sub>3</sub>)  $\delta$  8.38 (1 H, bs, PyrH), 8.25 (1 H, d, *J* 0.8, PyrH), 7.45 (1 H, dd, *J* 2.0, 8.4, PyrH), 7.30 (1 H, dd, *J* 4.0, 8.4, PyrH), 5.66 (1 H, s, 6-H), 5.39 (2 H, s, CH<sub>2</sub>), 3.93 (3 H, s, Me), 3.84 (3 H, s, Me), 2.34 (3 H, s, Me); <sup>13</sup>C NMR (100 MHz; CDCl<sub>3</sub>)  $\delta$  178.7 (C), 178.2 (C), 159.6 (C), 154.8 (C), 141.9 (CH), 138.4 (CH), 138.1 (C), 128.9 (C), 124.1 (CH), 121.8 (CH), 121.3 (C), 116.3 (C), 106.8 (CH), 60.8 (CH<sub>2</sub>), 56.5 (Me), 32.4 (Me), 9.9 (Me); MS (ESI) 313 (MH<sup>+</sup>, 100%), 218 (76); Found: MH<sup>+</sup>, 313.1174. C<sub>17</sub>H<sub>16</sub>N<sub>2</sub>O<sub>4</sub> + H requires 313.1188.

### 5-Methoxy-1,2-dimethyl-3-(pyridin-4-yloxymethyl)indole-4,7-dione 13

mp 195 – 201 °C; UV (MeCN/nm)  $\lambda_{\text{max}}$  221 (log  $\epsilon$  4.12), 281 (3.98), 290 (4.00), 339 (3.25), 446 (3.01); IR (CHCl<sub>3</sub>/cm<sup>-1</sup>) 2962, 1673, 1640, 1594, 1463, 1000; <sup>1</sup>H NMR (400 MHz; CDCl<sub>3</sub>)  $\delta$  8.40 (2 H, br s, PyrH), 6.89 (2 H, d, *J* 4.8, PyrH), 5.62 (1 H, s, 6-H), 5.34 (2 H, s, CH<sub>2</sub>), 3.89 (3 H, s, Me), 3.80 (3 H, s, Me), 2.29 (3 H, s, Me); <sup>13</sup>C NMR (100 MHz; CDCl<sub>3</sub>)  $\delta$  178.7 (C), 178.3 (C), 164.5 (C), 159.6 (C), 151.1 (CH), 138.1 (C), 128.9 (C), 121.2 (C), 115.9 (C), 110.6 (CH), 106.8 (CH), 60.1 (CH<sub>2</sub>), 56.5 (Me), 32.4 (Me), 9.9 (Me); MS (ESI) 218 (MH<sup>+</sup>, 100%), 313 (9); Found: MH<sup>+</sup>, 313.1190. C<sub>17</sub>H<sub>16</sub>N<sub>2</sub>O<sub>4</sub> + H requires 313.1188.

s

### 6-Methoxy-1,2-dimethyl-3-(4-nitrophenoxyethyl)indole-4,7-dione 15

mp 213 – 215 °C (decomp) (from methanol); UV (MeCN/nm)  $\lambda_{\text{max}}$  228 (log  $\epsilon$  4.18), 286 (4.16), 295 (4.21), 313 (4.03), 442 (3.05); IR (KBr/cm<sup>-1</sup>) 3436, 2923, 1668, 1649, 1593, 1509, 1493, 1465, 1343, 1264, 1172; <sup>1</sup>H NMR (300 MHz; CDCl<sub>3</sub>)  $\delta$  8.19 (2 H, d, *J* 9.3, ArH), 7.06 (2 H, d, *J* 9.3, ArH), 5.68 (1 H, s, 5-H), 5.43 (2 H, s, CH<sub>2</sub>), 3.92 (3 H, s, Me), 3.83 (3 H, s, Me), 2.34 (3 H, s, Me); <sup>13</sup>C NMR (75 MHz; CDCl<sub>3</sub>)  $\delta$  184.9 (C), 171.8 (C), 163.9 (C), 160.4 (C), 142.0 (C), 140.8 (C), 127.5 (C), 126.3 (CH), 124.3 (C), 116.4 (C), 115.3 (CH), 107.1 (CH), 61.3 (CH<sub>2</sub>), 57.1 (Me), 33.1 (Me), 10.6 (Me); MS (FI) 356 (M<sup>+</sup>, 10%), 219 (28), 139 (100); Found: M<sup>+</sup>, 356.1006. C<sub>18</sub>H<sub>16</sub>N<sub>2</sub>O<sub>6</sub> requires 356.1008.

### 6-Methoxy-1,2-dimethyl-3-(phenoxyethyl)indole-4,7-dione 16

mp 173 – 175 °C (decomp) (from ethyl acetate/light petroleum); UV (MeCN/nm)  $\lambda_{\text{max}}$  224 (log  $\epsilon$  4.10), 284 (3.92), 293 (3.91), 341 (3.36), 447 (2.83); IR (CHCl<sub>3</sub>/cm<sup>-1</sup>) 2928, 1662, 1642, 1604, 1495, 1467, 1379, 1339, 1170, 1058; <sup>1</sup>H NMR (500 MHz; DMSO-*d*)  $\delta$  7.29 (2 H, m, ArH), 6.99 (2 H, m, ArH), 6.94 (1 H, m, ArH), 5.77 (1 H, s, 5-H), 5.20 (2 H, s, CH<sub>2</sub>) 3.87 (3 H, s, Me), 3.78 (3 H, s, Me), 2.29 (3 H, s, Me); <sup>13</sup>C NMR (125 MHz; DMSO-*d*)  $\delta$  184.4 (C), 171.0 (C), 160.3 (C), 158.9 (C), 141.5 (C), 129.9 (CH), 126.9 (C), 123.7 (C), 121.0 (CH), 116.7 (C), 115.0 (CH), 106.9 (CH), 59.9 (CH<sub>2</sub>), 57.1 (Me), 32.9 (Me), 10.0 (Me); MS (ES) 334 (M+Na<sup>+</sup>, 100%), 218 (11); Found: M+Na<sup>+</sup>, 334.1056. C<sub>18</sub>H<sub>17</sub>NO<sub>4</sub> + Na requires 334.1055.

### 3-(4-Aminophenoxyethyl)-6-methoxy-1,2-dimethylindole-4,7-dione 17

mp 211 – 213 °C (from MeCN/hexane); UV (MeCN/nm)  $\lambda_{\text{max}}$  231 (log  $\epsilon$  4.17), 285 (4.08), 293 (4.07), 339 (3.58), 443 (3.20); IR (CHCl<sub>3</sub>/cm<sup>-1</sup>) 3361, 2929, 1654, 1629, 1600, 1509, 1487, 1471,

1339, 1240, 1216, 1174, 1057;  $^1\text{H}$  NMR (400 MHz;  $\text{CDCl}_3$ )  $\delta$  6.86 – 6.82 (2 H, m, ArH), 6.65 – 6.62 (2 H, m, ArH), 5.64 (1 H, s, 5-H), 5.23 (2 H, s,  $\text{CH}_2$ ), 3.90 (3 H, s, Me), 3.81 (3 H, s, Me), 3.42 (2 H, bs,  $\text{NH}_2$ ), 2.31 (3 H, s, Me);  $^{13}\text{C}$  NMR (125 MHz;  $\text{CDCl}_3$ )  $\delta$  184.4 (C), 171.3 (C), 159.8 (C), 151.6 (C), 140.4 (C), 140.2 (C), 126.9 (C), 124.0 (C), 118.1 (C), 116.3 (CH), 116.2 (CH), 106.7 (CH), 61.0 ( $\text{CH}_2$ ), 56.5 (Me), 32.6 (Me), 10.2 (Me); MS (ES) 349 ( $\text{M}+\text{Na}^+$ , 100%), 327 (45); Found:  $\text{M}+\text{Na}^+$ , 349.1156.  $\text{C}_{18}\text{H}_{18}\text{N}_2\text{O}_4 + \text{Na}$  requires 349.1164.

### 6-Methoxy-1,2-dimethyl-3-(3-nitrophenoxyethyl)indole-4,7-dione 18

mp 203 – 205 °C (from ethyl acetate/light petroleum); UV (MeCN/nm)  $\lambda_{\text{max}}$  228 (log  $\epsilon$  4.41), 283 (4.27), 291 (4.23), 335 (3.82), 446 (3.16); IR ( $\text{CHCl}_3/\text{cm}^{-1}$ ) 1664, 1642, 1604, 1467, 1352, 1058;  $^1\text{H}$  NMR (500 MHz;  $\text{DMSO}-d_6$ )  $\delta$  7.82 – 7.79 (2 H, m, ArH), 7.58 (1 H, t,  $J$  8.0, ArH), 7.44 (1 H, ddd,  $J$  8.0, 2.5, 1.5, ArH), 5.76 (1 H, s, 5-H), 5.32 (2 H, s,  $\text{CH}_2$ ) 3.86 (3 H, s, Me), 3.77 (3 H, s, Me), 2.30 (3 H, s, Me);  $^{13}\text{C}$  NMR (125 MHz;  $\text{DMSO}-d_6$ )  $\delta$  183.8 (C), 170.6 (C), 159.8 (C), 159.0 (C), 148.8 (C), 141.1 (C), 130.7 (C), 126.6 (C), 123.3 (C), 122.2 (CH), 115.6 (CH), 115.2 (C), 108.8 (CH), 106.4 (CH), 60.5 ( $\text{CH}_2$ ), 56.7 (Me), 32.5 (Me), 9.5 ( $\text{CH}_3$ ); MS (ES) 379 ( $\text{M}+\text{Na}^+$ , 100%), 218 (16); Found:  $\text{M}+\text{Na}^+$ , 379.0906.  $\text{C}_{18}\text{H}_{16}\text{N}_2\text{O}_6 + \text{Na}$  requires 379.0901.

### 6-Methoxy-1,2-dimethyl-3-(2-nitrophenoxyethyl)indole-4,7-dione 19

mp 222 – 224 °C (from ethyl acetate); UV (MeCN/nm)  $\lambda_{\text{max}}$  217 (log  $\epsilon$  4.32), 284 (4.13), 293 (4.12), 322 (3.67), 334 (3.69), 446 (2.92); IR ( $\text{CHCl}_3/\text{cm}^{-1}$ ) 3468, 3123, 2784, 1685, 1656, 1575, 1522, 1466, 1399;  $^1\text{H}$  NMR (500 MHz;  $\text{CDCl}_3$ )  $\delta$  7.78 (1 H, dd,  $J$  8.1, 1.7, ArH), 7.49 (1 H, ddd,  $J$  8.5, 7.4, 1.7, ArH), 7.39 (1 H, dd,  $J$  8.5, 0.9, ArH), 7.00, (1 H, m, ArH), 5.66 (1 H, s, 5-H), 5.53 (2 H, s,  $\text{CH}_2$ ), 3.91 (3 H, s, Me), 3.82 (3 H, s, Me), 2.38 (3 H, s, Me);  $^{13}\text{C}$  NMR (100 MHz;  $\text{CDCl}_3$ )  $\delta$  185.1 (C), 171.6 (C), 160.4 (C), 151.9 (C), 141.6 (C), 140.7 (C), 134.5 (CH), 127.3 (C), 125.7 (CH), 124.1 (C), 120.9 (CH), 116.6 (C), 116.3 (CH), 106.9 (CH), 62.1 ( $\text{CH}_2$ ), 57.0 (Me), 33.0 (Me), 10.6 (Me); MS (ES) 379 ( $\text{M}+\text{Na}^+$ , 100%); Found:  $\text{M}+\text{Na}^+$ , 379.0901.  $\text{C}_{18}\text{H}_{16}\text{N}_2\text{O}_6 + \text{Na}$  requires 379.0906.

### 6-Methoxy-1,2-dimethyl-3-(2,4-dinitrophenoxyethyl)indole-4,7-dione 20

mp 184 – 186 °C (from ethyl acetate/light petroleum); UV (MeCN/nm)  $\lambda_{\text{max}}$  221 (log  $\epsilon$  4.40), 287 (4.40), 294 (4.43), 444 (3.20); IR ( $\text{CHCl}_3/\text{cm}^{-1}$ ) 1666, 1637, 1605, 1466, 1345, 1057;  $^1\text{H}$  NMR

(400 MHz; DMSO-*d*)  $\delta$  8.68 (1 H, d, *J* 2.8, ArH), 8.37 (1 H, dd, *J* 2.8, 9.2, ArH), 7.60 (1 H, d, *J* 9.2, ArH), 5.69 (1 H, s, 5-H), 5.67 (2 H, s, CH<sub>2</sub>) 3.91 (3 H, s, Me), 3.84 (3 H, s, Me), 2.38 (3 H, s, Me); <sup>13</sup>C NMR (100 MHz; CDCl<sub>3</sub>)  $\delta$  184.9 (C), 171.3 (C), 160.1 (C), 156.0 (C), 141.4 (C), 140.1 (C), 139.3 (C), 129.0 (CH), 127.0 (C), 123.6 (C), 121.7 (CH), 115.9 (CH), 114.7 (C), 106.6 (CH), 62.5 (CH<sub>2</sub>), 56.8 (Me), 32.8 (Me), 10.3 (Me); MS (ES) 424 (M+Na<sup>+</sup>, 100%); Found: M+Na<sup>+</sup>, 424.0735. C<sub>18</sub>H<sub>15</sub>N<sub>3</sub>O<sub>8</sub> + Na requires 424.0756.

### 3-(2-Fluoro-4-nitrophenoxyethyl)-6-methoxy-1,2-dimethylindole-4,7-dione 21

mp 229 – 231 °C (from chloroform/hexane); UV (MeCN/nm)  $\epsilon_{\text{max}}$  226 (log  $\epsilon$  4.41), 287 (4.39), 294 (4.19), 316 (4.19), 435 (3.41); IR (CHCl<sub>3</sub>/cm<sup>-1</sup>) 1665, 1641, 1604, 1466, 1347, 1278, 1076, 1057; <sup>1</sup>H NMR (400 MHz; CDCl<sub>3</sub>)  $\delta$  8.04 (1 H, ddd, *J* 8.8, 2.8, 1.6, ArH), 7.96 (1 H, dd, *J* 10.8, 2.8, ArH), 7.34 (1 H, dd, *J* 8.8, 8.4, ArH), 5.68 (1 H, s, 5-H), 5.53 (2 H, s, CH<sub>2</sub>) 3.92 (3 H, s, Me), 3.83 (3 H, s, Me), 2.36 (3 H, s, Me); <sup>13</sup>C NMR (100 MHz; CDCl<sub>3</sub>)  $\delta$  184.6 (C), 171.4 (C), 160.0 (C), 151.5 (d, *J*<sub>CF</sub> 249, CF), 152.2 (d, *J*<sub>CF</sub> 11.3, C), 140.9 (C), 140.7 (C), 127.2 (C), 123.9 (C), 121.0 (d, *J*<sub>CF</sub> 3.8, CH), 115.6 (C), 114.1 (CH), 112.3 (d, *J*<sub>CF</sub> 23.8, CH), 106.7 (CH), 61.8 (CH<sub>2</sub>), 56.7 (Me), 32.7 (Me), 10.2 (Me); MS (ES) 397 (M+Na<sup>+</sup>, 79%), 218 (100); Found: M+Na<sup>+</sup>, 397.0788. C<sub>18</sub>H<sub>15</sub>FN<sub>2</sub>O<sub>6</sub> + Na requires 397.0812.

### 3-(4-Cyanophenoxyethyl)-6-methoxy-1,2-dimethylindole-4,7-dione 22

mp 184 °C (from ethyl acetate); UV (MeCN/nm)  $\epsilon_{\text{max}}$  235 (log  $\epsilon$  4.35), 249 (4.34), 284 (4.23), 293 (4.21), 339 (3.70), 444 (3.19); IR (CHCl<sub>3</sub>/cm<sup>-1</sup>) 2939, 1666, 1645, 1606, 1507, 1441, 1338, 1241, 1173, 1120, 1058; <sup>1</sup>H NMR (400 MHz; CDCl<sub>3</sub>)  $\delta$  7.57 (2 H, dd, *J* 7.0, 1.8, ArH), 7.05 (2 H, dd, *J* 7.0, 1.8, ArH), 5.67 (1 H, s, 5-H), 5.38 (2 H, s, CH<sub>2</sub>), 3.92 (3 H, s, Me), 3.83 (3 H, s, Me), 2.32 (3 H, s, Me); <sup>13</sup>C NMR (100 MHz; CDCl<sub>3</sub>)  $\delta$  184.4 (C), 171.4 (C), 161.7 (C), 159.9 (C), 140.3 (C), 134.0 (CH), 127.1 (C), 123.9 (C), 119.2 (C), 116.2 (C), 115.6 (CH), 106.7 (CH), 104.1 (C), 60.5 (CH<sub>2</sub>), 56.6 (Me), 32.7 (Me), 10.2 (Me); MS (ES) 359 (M+Na<sup>+</sup>, 80%), 218 (100); Found: M+Na<sup>+</sup>, 359.1017. C<sub>19</sub>H<sub>16</sub>N<sub>2</sub>O<sub>4</sub> + Na requires 359.1007.

### 6-Methoxy-1,2-dimethyl-3-[4-(trifluoromethyl)phenoxyethyl]indole-4,7-dione 23

mp 150 °C (from ethyl acetate/hexane); UV (MeCN/nm)  $\epsilon_{\text{max}}$  229 (log  $\epsilon$  4.41), 284 (4.17), 293 (4.15), 337 (3.65), 441 (3.16); IR (CHCl<sub>3</sub>/cm<sup>-1</sup>) 2939, 1167, 1614, 1590, 1518, 1439, 1424, 1324,

1248, 1182, 1127, 1057;  $^1\text{H}$  NMR (400 MHz;  $\text{CDCl}_3$ )  $\delta$  7.52 (2 H, d,  $J$  8.8, ArH), 7.05 (2 H, d,  $J$  8.8, ArH), 5.66 (1 H, s, 5-H), 5.37 (2 H, s,  $\text{CH}_2$ ), 3.91 (3 H, s, Me), 3.82 (3 H, s, Me), 2.32 (3 H, s, Me);  $^{13}\text{C}$  NMR (100 MHz;  $\text{CDCl}_3$ )  $\delta$  184.4 (C), 171.4 (C), 160.9 (C), 159.9 (C), 140.3 (C), 127.1 (C), 126.8 (q,  $J_{\text{CF}}$  3.7, CH), 124.4 (q,  $J_{\text{CF}}$  271,  $\text{CF}_3$ ), 123.0 (q,  $J_{\text{CF}}$  32.7, C), 123.9 (C), 116.7 (C), 114.8 (CH), 106.7 (CH), 60.4 ( $\text{CH}_2$ ), 56.6 (Me), 32.6 (Me), 10.2 (Me); MS (ES) 402 ( $\text{M}+\text{Na}^+$ , 49%), 218 (100); Found:  $\text{M}+\text{Na}^+$ , 402.0930.  $\text{C}_{19}\text{H}_{16}\text{F}_3\text{NO}_4 + \text{Na}$  requires 402.0929.

### 3-(4-Fluorophenoxymethyl)-6-methoxy-1,2-dimethylindole-4,7-dione 24

mp 171 °C (from ethyl acetate); UV (MeCN/nm)  $\epsilon_{\text{max}}$  221 (log  $\epsilon$  4.14), 283 (4.06), 291 (4.02), 340 (3.49), 448 (3.01); IR ( $\text{CHCl}_3/\text{cm}^{-1}$ ) 3693, 2939, 1665, 1643, 1604, 1506, 1338, 1238, 1222, 1209, 1180, 1057;  $^1\text{H}$  NMR (400 MHz;  $\text{CDCl}_3$ )  $\delta$  6.96 – 6.93 (4 H, m, ArH), 5.65 (1 H, s, 5-H), 5.28 (2 H, s,  $\text{CH}_2$ ), 3.91 (3 H, s, Me), 3.82 (3 H, s, Me), 2.32 (3 H, s, Me);  $^{13}\text{C}$  NMR (100 MHz;  $\text{CDCl}_3$ )  $\delta$  184.4 (C), 171.4 (C), 159.9 (C), 157.4 (d,  $J_{\text{CF}}$  238, CF), 154.6 (C), 140.3 (C), 127.0 (C), 124.0 (C), 117.4 (C), 116.0 (d,  $J_{\text{CF}}$  8.1, CH), 115.8 (d,  $J_{\text{CF}}$  23.0, CH), 106.7 (CH), 60.9 ( $\text{CH}_2$ ), 56.6 (Me), 32.6 (Me), 10.2 (Me); MS (ES) 352 ( $\text{M}+\text{Na}^+$ , 100%), 218 (56); Found:  $\text{M}+\text{Na}^+$ , 352.0959.  $\text{C}_{18}\text{H}_{16}\text{FNO}_4 + \text{Na}$  requires 352.0961.

### 3-(2,4-Difluorophenoxymethyl)-6-methoxy-1,2-dimethylindole-4,7-dione 25

mp 173 °C (from ethyl acetate); UV (MeCN/nm)  $\epsilon_{\text{max}}$  220 (log  $\epsilon$  4.29), 284 (4.24), 293 (4.20), 339 (3.70); IR ( $\text{CHCl}_3/\text{cm}^{-1}$ ) 3020, 2939, 1685, 1643, 1604, 1513, 1436, 1338, 1258, 1224, 1212, 1180, 1057;  $^1\text{H}$  NMR (400 MHz;  $\text{CDCl}_3$ )  $\delta$  7.11 (1 H, td,  $J$  9.2, 5.4, ArH), 6.82 (1 H, ddd,  $J$  11.2, 8.3, 2.8, ArH), 6.79 – 6.73 (1 H, m, ArH), 5.65 (1 H, s, 5-H), 5.34 (2 H, s,  $\text{CH}_2$ ), 3.91 (3 H, s, Me), 3.81 (3 H, s, Me), 2.35 (3 H, s, Me);  $^{13}\text{C}$  NMR (100 MHz;  $\text{CDCl}_3$ )  $\delta$  184.4 (C), 171.4 (C), 159.9 (C), 156.7 (dd,  $J_{\text{CF}}$  242, 10.3, CF), 152.9 (dd,  $J_{\text{CF}}$  249, 12.1, CF), 142.8 (dd,  $J_{\text{CF}}$  10.8, 3.3, C), 140.7 (C), 127.0 (C), 124.0 (C), 117.0 (dd,  $J_{\text{CF}}$  9.5, 2.9, CH), 116.9 (C), 110.4 (dd,  $J_{\text{CF}}$  22.4, 3.8, CH), 106.6 (CH), 104.7 (dd,  $^2J$  26.7,  $^2J$  22.3, CH), 62.3 ( $\text{CH}_2$ ), 56.6 (Me), 32.6 (Me), 10.1 (Me); MS (ES) 370 ( $\text{M}+\text{Na}^+$ , 80%), 218 (100); Found:  $\text{M}+\text{Na}^+$ , 370.0863.  $\text{C}_{18}\text{H}_{15}\text{F}_2\text{NO}_4 + \text{Na}$  requires 370.0867.

### 6-Methoxy-1,2-dimethyl-3-(2,4,6-trifluorophenoxymethyl)indole-4,7-dione 26

mp 221 °C (from ethyl acetate/hexane); UV (MeCN/nm)  $\lambda_{\text{max}}$  219 (log  $\epsilon$  4.25), 285 (4.21), 292 (4.20), 338 (3.70), 438 (3.21); IR (CHCl<sub>3</sub>/cm<sup>-1</sup>) 2939, 1166, 1645, 1606, 1548, 1508, 1440, 1338, 1240, 1174, 1120, 1058; <sup>1</sup>H NMR (400 MHz; CDCl<sub>3</sub>)  $\delta$  6.67 (2 H, t, *J* 8.2, ArH), 5.60 (1 H, s, 5-H), 5.32 (2 H, s, CH<sub>2</sub>), 3.92 (3 H, s, Me), 3.79 (3 H, s, Me), 2.35 (3 H, s, Me); <sup>13</sup>C NMR (100 MHz; CDCl<sub>3</sub>)  $\delta$  183.9 (C), 171.5 (C), 159.7 (C), 157.3 (dt, *J*<sub>CF</sub> 246, 14.3, CF), 156.5 (ddd, *J*<sub>CF</sub> 250, 14.8, 7.7, CF), 141.0 (C), 131.9 (dd, *J*<sub>CF</sub> 15.3, 5.0, C), 127.0 (C), 124.2 (C), 116.5, (C), 106.6 (CH), 100.6 (t, *J*<sub>CF</sub> 26.7, CH), 65.9 (CH<sub>2</sub>), 56.5 (Me), 32.6 (Me), 9.7 (Me); MS (ES) 388 (M+Na<sup>+</sup>, 57%), 218 (100); Found: M+Na<sup>+</sup>, 388.0766. C<sub>18</sub>H<sub>14</sub>F<sub>3</sub>NO<sub>4</sub> + Na requires 388.0773.

### 6-Methoxy-1,2-dimethyl-3-(pyridin-2-yloxymethyl)indole-4,7-dione 27

mp 178 – 180 °C (from ethyl acetate/light petroleum); UV (MeCN/nm)  $\lambda_{\text{max}}$  218 (log  $\epsilon$  4.35), 282 (4.24), 292 (4.20), 341 (3.70), 446 (3.22); IR (CHCl<sub>3</sub>/cm<sup>-1</sup>) 2940, 1644, 1605, 1570, 1466, 1359, 1340, 1311, 1287, 1057; <sup>1</sup>H NMR (500 MHz; CDCl<sub>3</sub>)  $\delta$  8.19 (1 H, dd, *J* 5.0, 1.5, ArH), 7.57 – 7.54 (1 H, m, ArH), 6.88 (1H, ddd, *J* 7.0, 5.0, 1.0, ArH), 6.74 (1 H, d, *J* 8.5, ArH) 5.66 (1 H, s, 5-H), 5.54 (2 H, s, CH<sub>2</sub>), 3.92 (3 H, s, Me), 3.81 (3 H, s, Me), 2.35 (3 H, s, Me); <sup>13</sup>C NMR (100 MHz; CDCl<sub>3</sub>)  $\delta$  183.9 (C), 171.5 (C), 163.6 (C), 159.7 (C), 146.8 (CH), 140.3 (C), 138.5 (CH), 127.3 (C), 124.5 (C), 117.5 (C), 116.8 (CH), 111.1 (CH), 106.8 (CH), 57.9 (CH<sub>2</sub>), 56.5 (Me), 32.6 (Me), 10.0 (Me); MS (ES) 335 (M+Na<sup>+</sup>, 72%), 218 (100%); Found: M+Na<sup>+</sup>, 335.1006. C<sub>17</sub>H<sub>16</sub>N<sub>2</sub>O<sub>4</sub> + Na requires 335.1007.

### 3-Methoxy-1,2-dimethyl-3-(3-pyridyloxymethyl)indole-4,7-dione 28

mp 179 – 181 °C (from ethyl acetate/light petroleum); UV (MeCN/nm)  $\lambda_{\text{max}}$  221 (log  $\epsilon$  4.22), 284 (4.12), 340 (3.55), 444 (3.05); IR (CHCl<sub>3</sub>/cm<sup>-1</sup>) 2940, 1664, 1604, 1576, 1488, 1466, 1379, 1340, 1057; <sup>1</sup>H NMR (400 MHz; CDCl<sub>3</sub>)  $\delta$  8.36 (1 H, bs, ArH), 8.21 (1 H, apparent bd, ArH), 7.36 (1H, ddd, *J* 8.4, 1.6, 1.2, ArH), 7.22 (1 H, dd, *J* 8.4, 4.8, ArH) 5.67 (1 H, s, 5-H), 5.38 (2 H, s, CH<sub>2</sub>), 3.92 (3 H, s, Me), 3.82 (3 H, s, Me), 2.33 (3 H, s, Me); <sup>13</sup>C NMR (100 MHz; CDCl<sub>3</sub>)  $\delta$  184.4 (C), 171.4 (C), 159.9 (C), 154.7 (C), 142.1 (CH), 140.4 (C), 138.6 (CH), 127.1 (C), 124.0 (C), 123.9 (CH), 121.4 (CH), 116.6 (C), 106.7 (CH), 60.5 (CH<sub>2</sub>), 56.6 (Me), 32.6 (Me), 10.2 (Me); MS (EI) 313 (MH<sup>+</sup>, 100%); Found: MH<sup>+</sup>, 313.1178. C<sub>17</sub>H<sub>16</sub>N<sub>2</sub>O<sub>4</sub> + H requires 313.1188.

### 6-Methoxy-1,2-dimethyl-3-(pyridin-4-yloxymethyl)indole-4,7-dione 29

mp 161 – 163 °C (from ethanol/light petroleum); UV (MeCN/nm)  $\epsilon_{\text{max}}$  222 (log  $\epsilon$  4.34), 285 (4.18), 293 (4.17), 337 (3.68), 441 (3.18); IR (CHCl<sub>3</sub>/cm<sup>-1</sup>) 3438, 2939, 1664, 1641, 1604, 1594, 1571, 1465, 1340, 1282, 1057; <sup>1</sup>H NMR (400 MHz; CDCl<sub>3</sub>)  $\delta$  8.42 (2 H, d, *J* 5.0, ArH), 6.92 (2 H, d, *J* 5.0, ArH), 5.67 (1 H, s, 5-H), 5.39 (2 H, s, CH<sub>2</sub>), 3.92 (3 H, s, Me), 3.83 (3 H, s, Me), 2.32 (3 H, s, Me); <sup>13</sup>C NMR (100 MHz; CDCl<sub>3</sub>)  $\delta$  184.5 (C), 171.4 (C), 164.7 (C), 160.0 (C), 150.8 (CH), 140.4 (C), 127.2 (C), 123.9 (C), 116.1 (C), 110.7 (CH), 106.7 (CH), 60.2 (CH<sub>2</sub>), 56.6 (Me), 32.7 (Me), 10.2 (Me); MS (ES) 313 (MH<sup>+</sup>, 17%), 218 (100); Found: MH<sup>+</sup>, 313.1177. C<sub>17</sub>H<sub>16</sub>N<sub>2</sub>O<sub>4</sub> + H requires 313.1188.

**HPLC Analysis of test compounds**

**HPLC:** VARIAN ProStar Model 701  
**Column:** VARIAN Polaris 5 C18-A 250x4.6 mm  
**UV Detection:** 295 nm  
**Solvent system:** A = Water  
B = Acetonitrile

**Volume of injection:** 20  $\mu$ L

**Sequence:**

| Time [min] | Flow [mL/min] | % A  | % B   |
|------------|---------------|------|-------|
| Prerun     | 1.000         | 75.0 | 25.0  |
| 2.000      | 1.000         | 75.0 | 25.0  |
| 12.000     | 1.000         | 30.0 | 70.0  |
| 15.000     | 1.000         | 0.0  | 100.0 |
| 17.000     | 1.000         | 0.0  | 100.0 |
| 19.000     | 1.000         | 75.0 | 25.0  |

- 
- 
-



- Compound 6

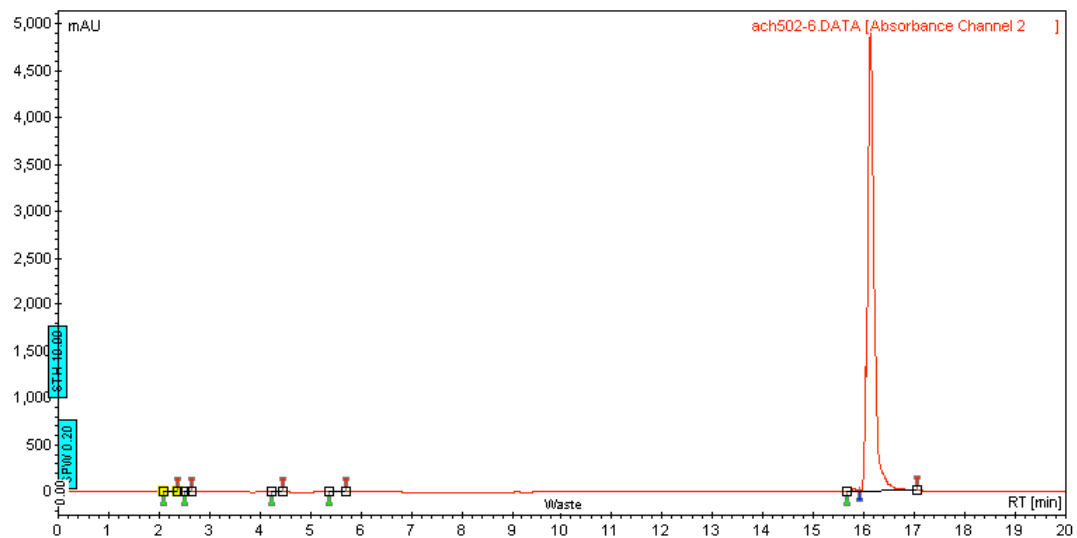

| Index        | Time [Min] | Quantity [% Area] | Height [mAU] | Area [mAU.Min] | Area % [%] |
|--------------|------------|-------------------|--------------|----------------|------------|
| 1            | 2.25       | 0.08              | 3.9          | 0.6            | 0.076      |
| 2            | 2.56       | 0.04              | 4.3          | 0.3            | 0.037      |
| 3            | 4.33       | 0.04              | 2.7          | 0.3            | 0.041      |
| 4            | 5.52       | 0.11              | 4.9          | 0.8            | 0.111      |
| 5            | 15.80      | 0.50              | 35.0         | 3.7            | 0.499      |
| 6            | 16.13      | 99.24             | 4885.9       | 742.4          | 99.237     |
| <b>Total</b> |            | 100.00            | 4936.8       | 748.1          | 100.000    |

- Compound 7

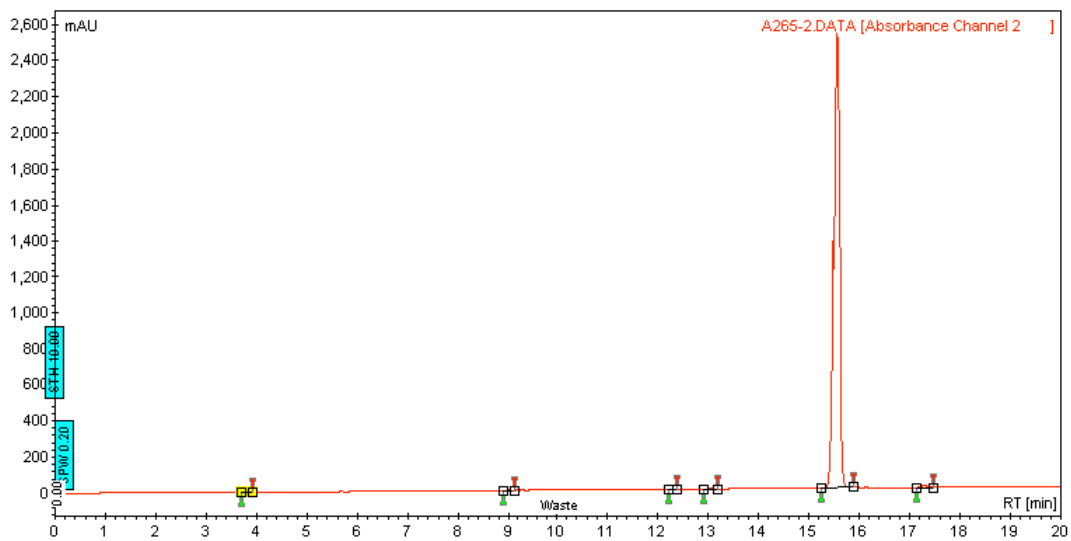

| Index        | Time [Min] | Quantity [% Area] | Height [mAU] | Area [mAU.Min] | Area % [%] |
|--------------|------------|-------------------|--------------|----------------|------------|
| 1            | 3.83       | 0.04              | 1.4          | 0.1            | 0.044      |
| 2            | 9.00       | 0.06              | 1.8          | 0.2            | 0.058      |
| 3            | 12.28      | 0.02              | 0.9          | 0.1            | 0.025      |
| 4            | 13.04      | 0.09              | 2.0          | 0.3            | 0.085      |
| 5            | 15.56      | 99.37             | 2517.8       | 341.4          | 99.372     |
| 6            | 17.28      | 0.42              | 13.4         | 1.4            | 0.417      |
| <b>Total</b> |            | 100.00            | 2537.4       | 343.6          | 100.000    |

- Compound 11

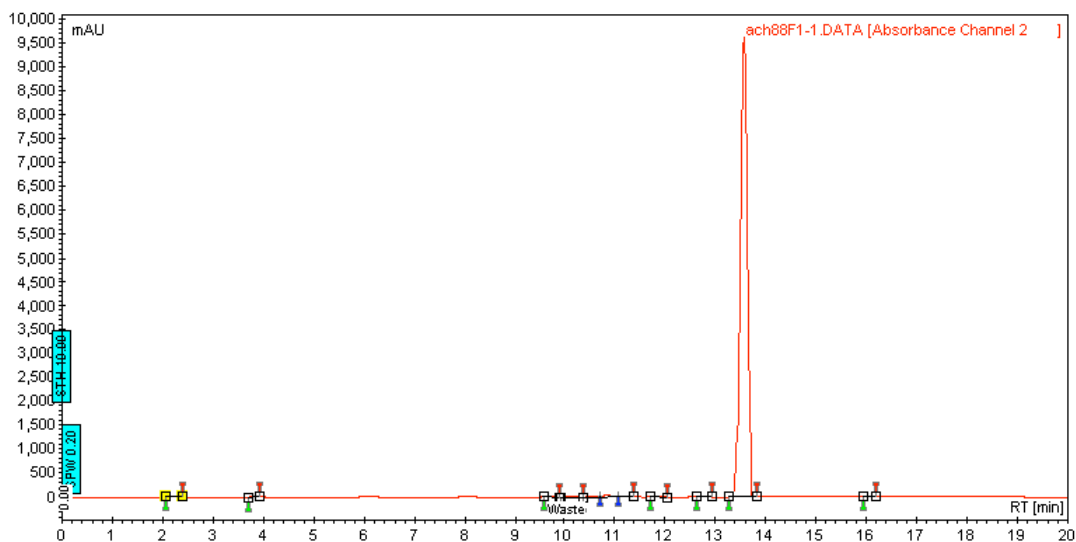

| Index        | Time [Min] | Quantity [% Area] | Height [mAU] | Area [mAU.Min] | Area % [%] |
|--------------|------------|-------------------|--------------|----------------|------------|
| 1            | 2.20       | 0.20              | 25.5         | 3.2            | 0.202      |
| 2            | 3.79       | 0.09              | 12.5         | 1.4            | 0.088      |
| 3            | 9.69       | 0.08              | 8.1          | 1.3            | 0.082      |
| 4            | 10.14      | 0.15              | 14.7         | 2.4            | 0.152      |
| 5            | 10.57      | 0.14              | 14.6         | 2.2            | 0.143      |
| 6            | 10.86      | 0.42              | 42.0         | 6.6            | 0.421      |
| 7            | 11.24      | 0.07              | 7.5          | 1.1            | 0.067      |
| 8            | 11.86      | 0.11              | 13.2         | 1.8            | 0.113      |
| 9            | 12.76      | 0.10              | 12.6         | 1.6            | 0.100      |
| 10           | 13.57      | 98.57             | 9585.3       | 1542.7         | 98.569     |
| 11           | 16.04      | 0.06              | 9.2          | 1.0            | 0.064      |
|              |            |                   |              |                |            |
| <b>Total</b> |            | 100.00            | 9745.0       | 1565.1         | 100.000    |

- Compound 12

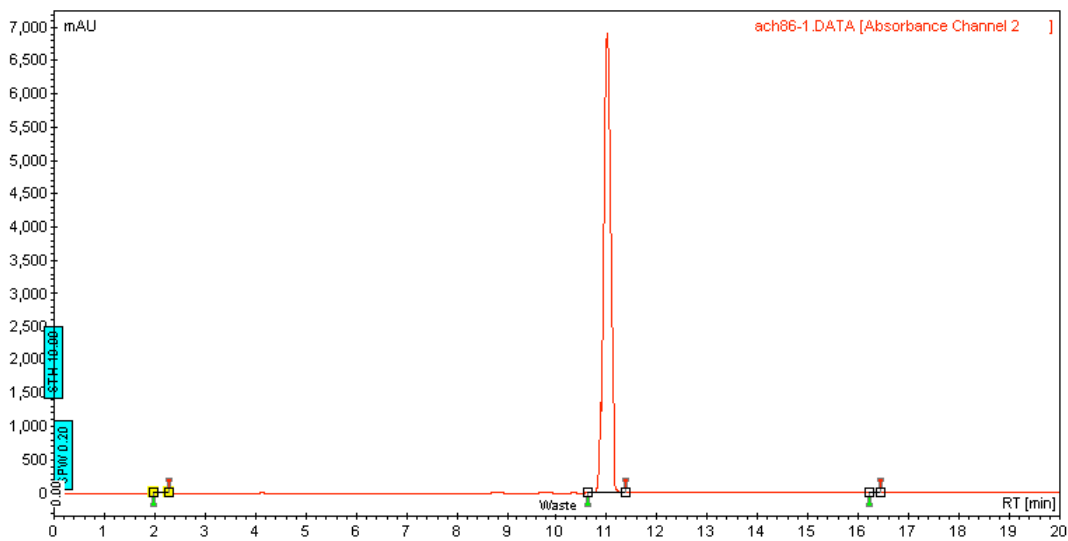

| Index        | Time [Min] | Quantity [% Area] | Height [mAU] | Area [mAU.Min] | Area % [%] |
|--------------|------------|-------------------|--------------|----------------|------------|
| 1            | 2.12       | 0.10              | 9.7          | 1.2            | 0.102      |
| 2            | 11.01      | 99.85             | 6891.1       | 1156.6         | 99.851     |
| 3            | 16.32      | 0.05              | 5.3          | 0.5            | 0.047      |
|              |            |                   |              |                |            |
| <b>Total</b> |            | 100.00            | 6906.1       | 1158.4         | 100.000    |

- Compound 13

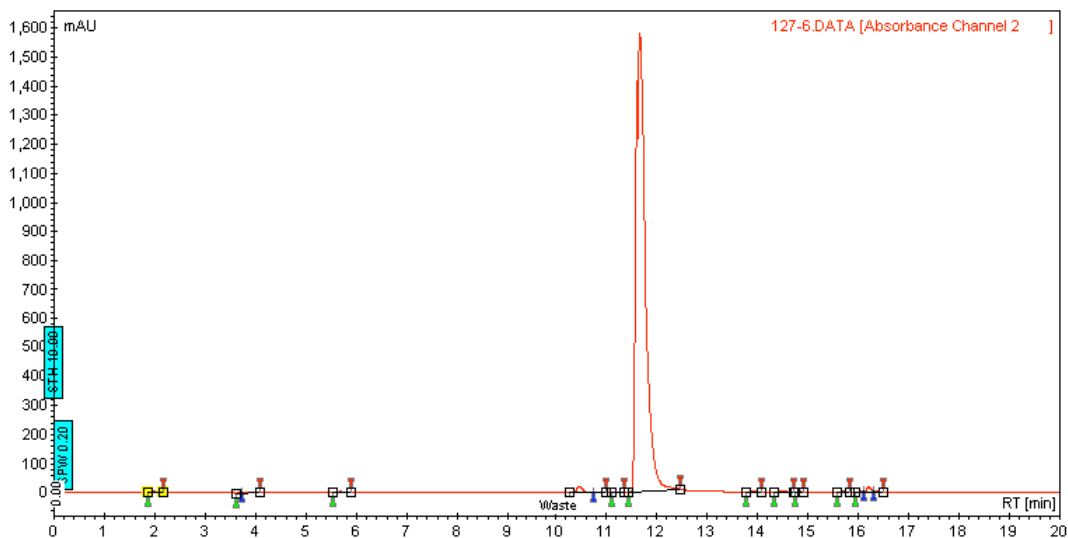

| Index        | Time [Min] | Quantity [% Area] | Height [mAU] | Area [mAU.Min] | Area % [%] |
|--------------|------------|-------------------|--------------|----------------|------------|
| 1            | 1.98       | 0.13              | 4.0          | 0.5            | 0.135      |
| 2            | 3.69       | 0.02              | 0.8          | 0.1            | 0.016      |
| 3            | 3.87       | 0.17              | 3.4          | 0.6            | 0.169      |
| 4            | 5.70       | 0.14              | 2.9          | 0.5            | 0.139      |
| 5            | 10.46      | 0.76              | 20.5         | 2.7            | 0.764      |
| 6            | 10.85      | 0.05              | 1.3          | 0.2            | 0.047      |
| 7            | 11.23      | 0.05              | 1.5          | 0.2            | 0.054      |
| 8            | 11.66      | 97.73             | 1573.6       | 340.5          | 97.727     |
| 9            | 13.91      | 0.11              | 3.5          | 0.4            | 0.110      |
| 10           | 14.50      | 0.13              | 2.6          | 0.4            | 0.129      |
| 11           | 14.82      | 0.03              | 1.1          | 0.1            | 0.026      |
| 12           | 15.70      | 0.04              | 1.5          | 0.2            | 0.044      |
| 13           | 16.07      | 0.07              | 2.7          | 0.2            | 0.069      |
| 14           | 16.21      | 0.44              | 16.1         | 1.5            | 0.440      |
| 15           | 16.34      | 0.13              | 5.2          | 0.5            | 0.132      |
|              |            |                   |              |                |            |
| <b>Total</b> |            | 100.00            | 1640.7       | 348.4          | 100.000    |

- Compound 15

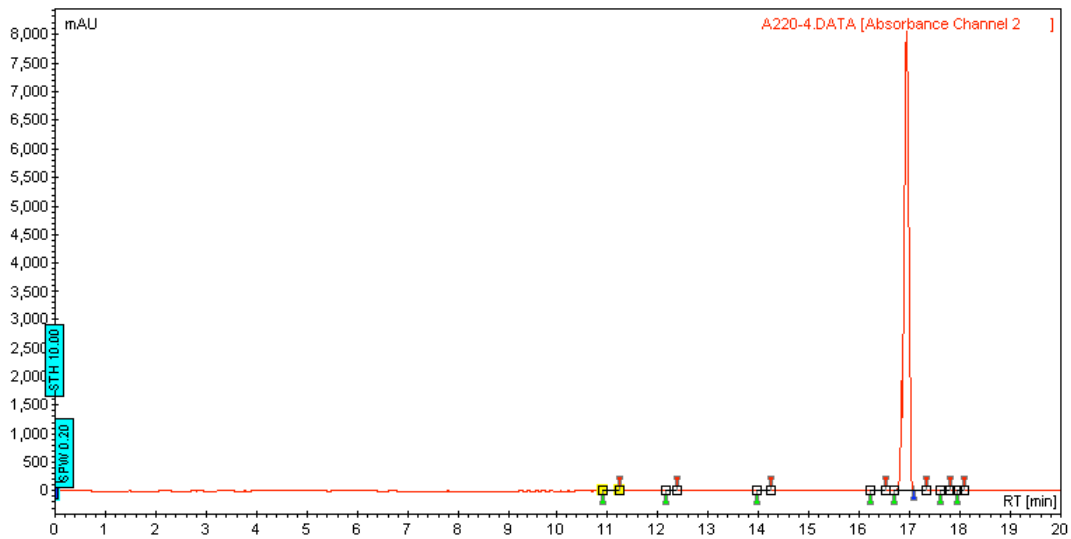

| Index        | Time [Min] | Quantity [% Area] | Height [mAU] | Area [mAU.Min] | Area % [%] |
|--------------|------------|-------------------|--------------|----------------|------------|
| 1            | 11.06      | 0.15              | 8.6          | 1.4            | 0.150      |
| 2            | 12.22      | 0.07              | 5.3          | 0.6            | 0.069      |
| 3            | 14.10      | 0.10              | 8.4          | 0.9            | 0.099      |
| 4            | 16.41      | 0.17              | 8.4          | 1.6            | 0.171      |
| 5            | 16.94      | 99.33             | 8029.3       | 910.7          | 99.330     |
| 6            | 17.13      | 0.09              | 5.4          | 0.8            | 0.089      |
| 7            | 17.71      | 0.06              | 6.0          | 0.5            | 0.056      |
| 8            | 18.01      | 0.04              | 4.5          | 0.3            | 0.035      |
|              |            |                   |              |                |            |
| <b>Total</b> |            | 100.00            | 8076.0       | 916.9          | 100.000    |

- Compound 16

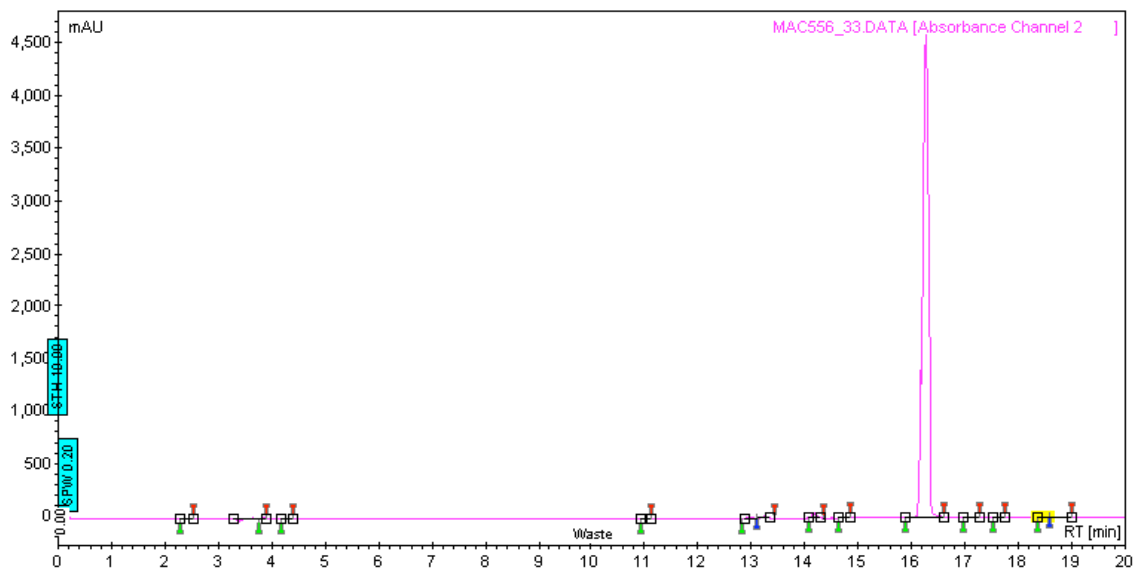

| Index        | Time [Min] | Quantity [% Area] | Height [mAU] | Area [mAU.Min] | Area % [%] |
|--------------|------------|-------------------|--------------|----------------|------------|
| 1            | 2.39       | 0.05              | 3.2          | 0.3            | 0.049      |
| 2            | 3.83       | 0.12              | 11.0         | 0.7            | 0.116      |
| 3            | 4.26       | 0.10              | 6.1          | 0.6            | 0.098      |
| 4            | 11.02      | 0.04              | 2.5          | 0.3            | 0.042      |
| 5            | 12.97      | 0.14              | 10.4         | 0.9            | 0.143      |
| 6            | 13.25      | 0.20              | 15.4         | 1.2            | 0.197      |
| 7            | 14.18      | 0.72              | 42.7         | 4.4            | 0.718      |
| 8            | 14.75      | 0.04              | 2.6          | 0.3            | 0.042      |
| 9            | 16.27      | 98.07             | 4576.0       | 595.4          | 98.074     |
| 10           | 17.14      | 0.12              | 4.8          | 0.7            | 0.121      |
| 11           | 17.64      | 0.05              | 2.8          | 0.3            | 0.046      |
| 12           | 18.52      | 0.31              | 11.7         | 1.9            | 0.306      |
| 13           | 18.60      | 0.05              | 2.9          | 0.3            | 0.048      |
|              |            |                   |              |                |            |
| <b>Total</b> |            | 100.00            | 4691.9       | 607.1          | 100.000    |

- Compound 17

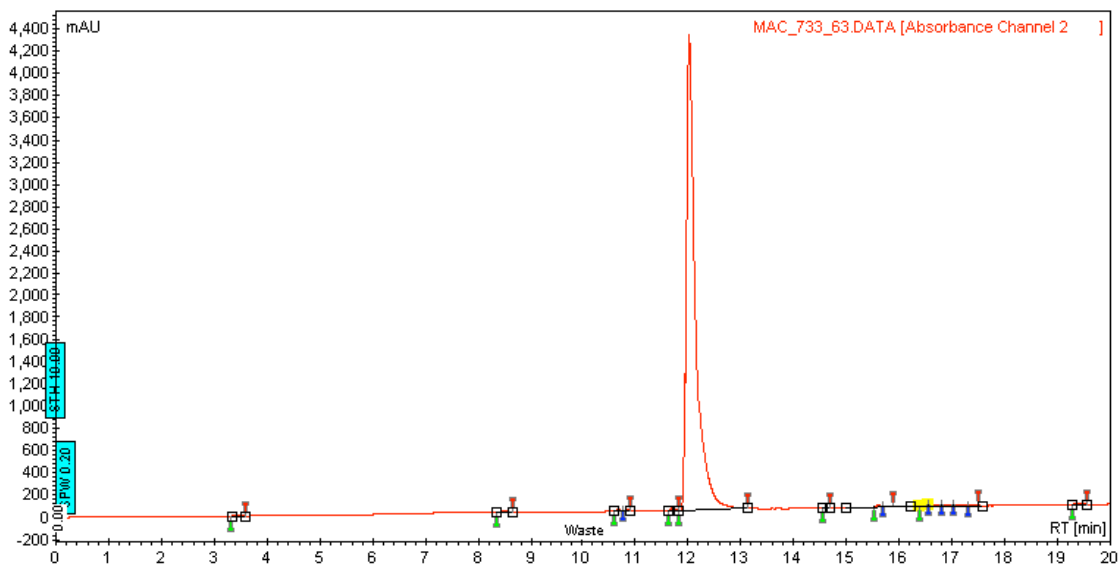

| Index        | Time [Min] | Quantity [% Area] | Height [mAU] | Area [mAU.Min] | Area % [%] |
|--------------|------------|-------------------|--------------|----------------|------------|
| 1            | 3.36       | 0.08              | 5.6          | 0.7            | 0.083      |
| 2            | 8.51       | 0.26              | 13.3         | 2.3            | 0.261      |
| 3            | 10.68      | 0.09              | 8.3          | 0.8            | 0.091      |
| 4            | 10.85      | 0.03              | 3.7          | 0.3            | 0.035      |
| 5            | 11.72      | 0.22              | 19.5         | 1.9            | 0.223      |
| 6            | 12.02      | 97.22             | 4271.7       | 845.9          | 97.217     |
| 7            | 14.63      | 0.06              | 6.2          | 0.5            | 0.058      |
| 8            | 15.60      | 0.24              | 20.5         | 2.1            | 0.242      |
| 9            | 15.82      | 0.15              | 10.3         | 1.3            | 0.148      |
| 10           | 16.49      | 0.36              | 29.1         | 3.1            | 0.360      |
| 11           | 16.55      | 0.39              | 19.0         | 3.4            | 0.393      |
| 12           | 16.90      | 0.28              | 14.3         | 2.4            | 0.278      |
| 13           | 17.16      | 0.26              | 12.8         | 2.3            | 0.265      |
| 14           | 17.43      | 0.14              | 10.4         | 1.2            | 0.137      |
| 15           | 19.37      | 0.21              | 13.9         | 1.8            | 0.211      |
|              |            |                   |              |                |            |
| <b>Total</b> |            | 100.00            | 4458.5       | 870.1          | 100.000    |



- Compound 18

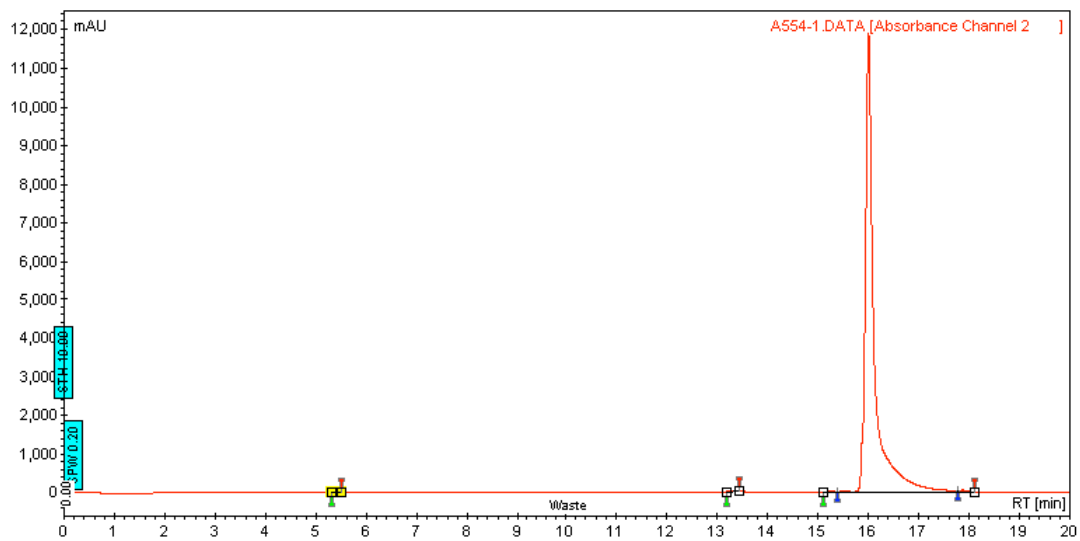

| Index        | Time [Min] | Quantity [% Area] | Height [mAU] | Area [mAU.Min] | Area % [%] |
|--------------|------------|-------------------|--------------|----------------|------------|
| 1            | 5.38       | 0.05              | 11.8         | 1.3            | 0.055      |
| 2            | 13.30      | 0.04              | 9.8          | 1.1            | 0.044      |
| 3            | 15.25      | 0.12              | 24.3         | 2.9            | 0.122      |
| 4            | 16.00      | 99.51             | 11866.4      | 2411.4         | 99.507     |
| 5            | 17.87      | 0.27              | 44.4         | 6.6            | 0.273      |
| <b>Total</b> |            | 100.00            | 11956.7      | 2423.3         | 100.000    |

- Compound 19

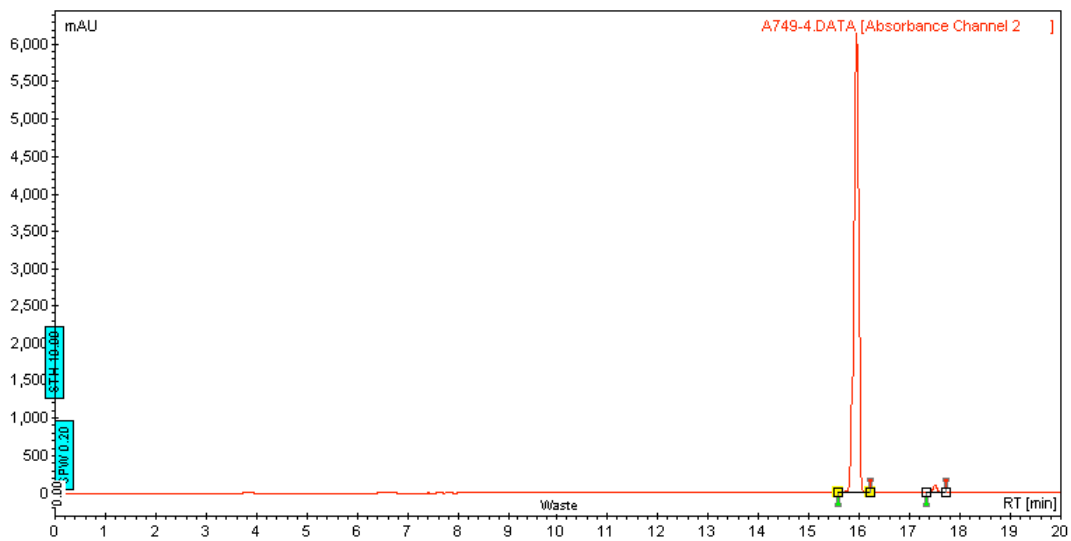

| Index        | Time [Min] | Quantity [% Area] | Height [mAU] | Area [mAU.Min] | Area % [%] |
|--------------|------------|-------------------|--------------|----------------|------------|
| 1            | 15.94      | 98.65             | 6122.9       | 696.5          | 98.649     |
| 2            | 17.50      | 1.35              | 98.0         | 9.5            | 1.351      |
| <b>Total</b> |            | 100.00            | 6220.9       | 706.0          | 100.000    |

- Compound 20

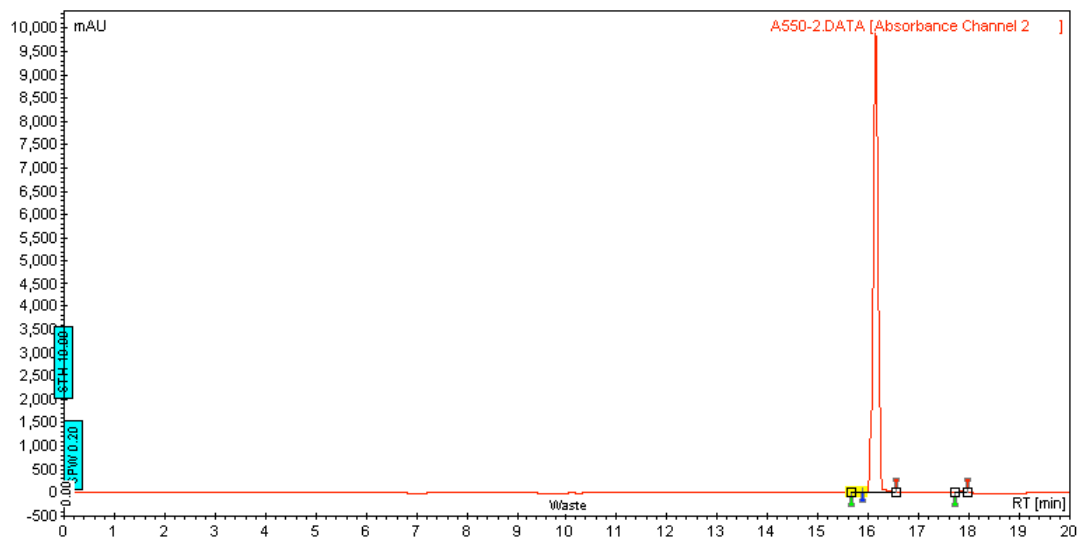

| Index        | Time [Min] | Quantity [% Area] | Height [mAU] | Area [mAU.Min] | Area % [%] |
|--------------|------------|-------------------|--------------|----------------|------------|
| 1            | 15.78      | 0.14              | 18.3         | 1.6            | 0.145      |
| 2            | 16.15      | 99.45             | 9873.1       | 1107.1         | 99.450     |
| 3            | 17.84      | 0.41              | 53.3         | 4.5            | 0.405      |
|              |            |                   |              |                |            |
| <b>Total</b> |            | 100.00            | 9944.7       | 1113.3         | 100.000    |

- Compound 21

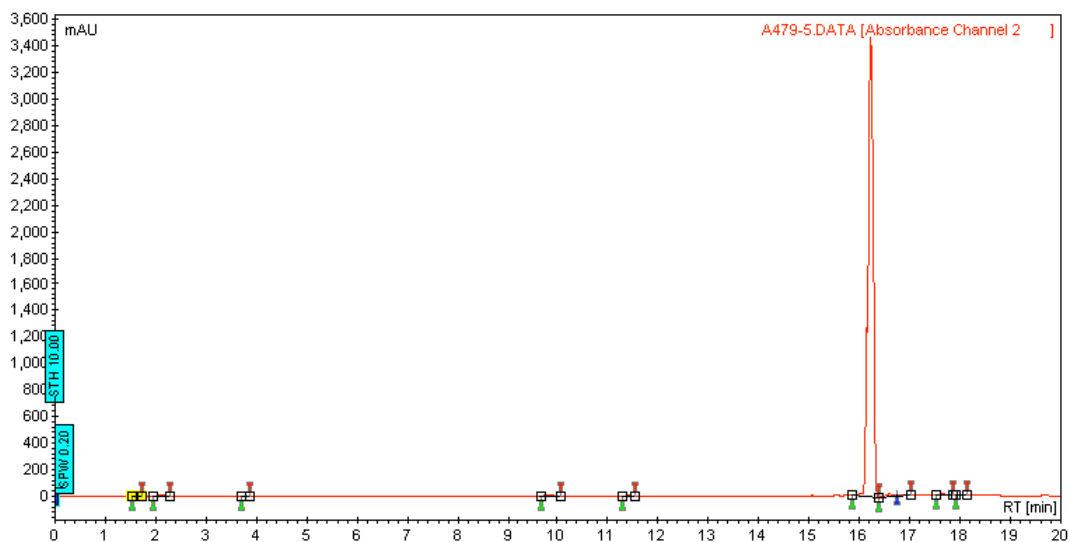

| Index        | Time [Min] | Quantity [% Area] | Height [mAU] | Area [mAU.Min] | Area % [%] |
|--------------|------------|-------------------|--------------|----------------|------------|
| 1            | 1.61       | 0.03              | 1.4          | 0.1            | 0.031      |
| 2            | 2.10       | 0.17              | 6.4          | 0.7            | 0.173      |
| 3            | 3.80       | 0.02              | 1.2          | 0.1            | 0.021      |
| 4            | 9.85       | 0.28              | 6.5          | 1.2            | 0.284      |
| 5            | 11.42      | 0.07              | 2.5          | 0.3            | 0.071      |
| 6            | 16.22      | 97.80             | 3468.3       | 417.1          | 97.801     |
| 7            | 16.60      | 0.77              | 18.2         | 3.3            | 0.774      |
| 8            | 16.86      | 0.28              | 7.9          | 1.2            | 0.279      |
| 9            | 17.65      | 0.50              | 19.9         | 2.1            | 0.497      |
| 10           | 18.02      | 0.70              | 3.0          | 0.3            | 0.069      |
|              |            |                   |              |                |            |
| <b>Total</b> |            | 100.00            | 3535.2       | 426.5          | 100.000    |

- Compound 22

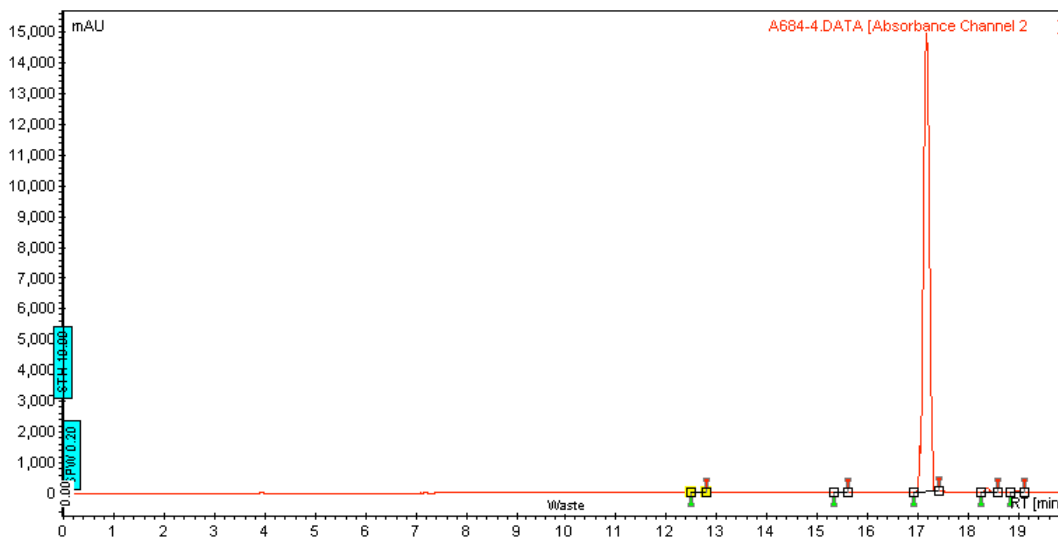

| Index        | Time [Min] | Quantity [% Area] | Height [mAU] | Area [mAU.Min] | Area % [%] |
|--------------|------------|-------------------|--------------|----------------|------------|
| 1            | 12.62      | 0.13              | 22.9         | 2.8            | 0.132      |
| 2            | 15.44      | 0.08              | 14.7         | 1.6            | 0.076      |
| 3            | 17.17      | 98.85             | 14884.6      | 2069.8         | 98.847     |
| 4            | 18.37      | 0.73              | 160.8        | 15.2           | 0.728      |
| 5            | 18.97      | 0.22              | 45.3         | 4.5            | 0.216      |
|              |            |                   |              |                |            |
| <b>Total</b> |            | 100.00            | 15128.2      | 2093.9         | 100.000    |

- Compound 24

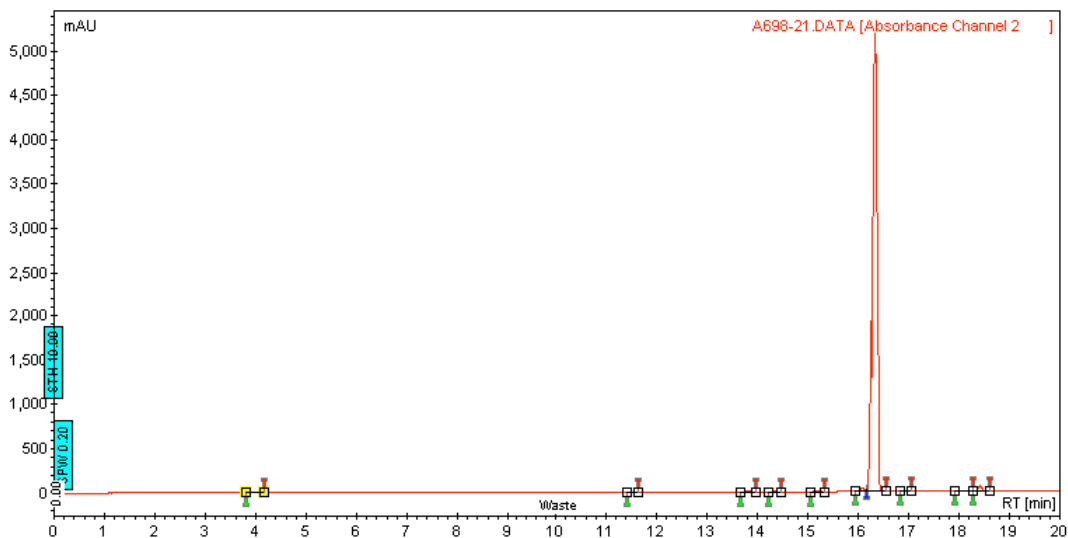

| Index        | Time [Min] | Quantity [% Area] | Height [mAU] | Area [mAU.Min] | Area % [%] |
|--------------|------------|-------------------|--------------|----------------|------------|
| 1            | 3.92       | 0.15              | 4.3          | 0.9            | 0.146      |
| 2            | 11.50      | 0.05              | 3.0          | 0.3            | 0.054      |
| 3            | 13.81      | 0.13              | 7.0          | 0.8            | 0.129      |
| 4            | 14.34      | 0.07              | 3.8          | 0.4            | 0.069      |
| 5            | 15.17      | 0.17              | 9.7          | 1.0            | 0.166      |
| 6            | 16.08      | 0.71              | 39.5         | 4.2            | 0.714      |
| 7            | 16.33      | 97.34             | 5168.8       | 569.1          | 97.337     |
| 8            | 16.93      | 0.12              | 8.1          | 0.7            | 0.120      |
| 9            | 18.06      | 0.25              | 13.6         | 1.5            | 0.248      |
| 10           | 18.41      | 1.02              | 63.8         | 6.0            | 1.018      |
|              |            |                   |              |                |            |
| <b>Total</b> |            | 100.00            | 5321.7       | 584.6          | 100.000    |

- Compound 27

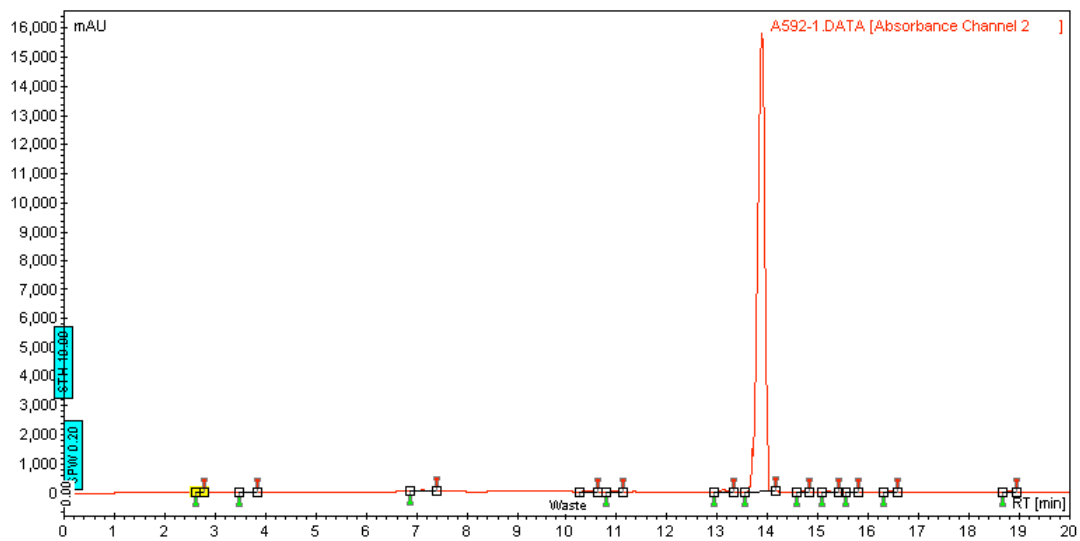

| Index        | Time [Min] | Quantity [% Area] | Height [mAU] | Area [mAU.Min] | Area % [%] |
|--------------|------------|-------------------|--------------|----------------|------------|
| 1            | 2.68       | 0.02              | 6.8          | 0.5            | 0.019      |
| 2            | 3.62       | 0.15              | 24.7         | 3.9            | 0.147      |
| 3            | 7.13       | 0.37              | 42.6         | 9.9            | 0.368      |
| 4            | 10.44      | 0.16              | 30.5         | 4.3            | 0.162      |
| 5            | 10.97      | 0.15              | 28.8         | 3.9            | 0.147      |
| 6            | 13.13      | 0.37              | 76.0         | 9.9            | 0.368      |
| 7            | 13.89      | 98.24             | 15759.3      | 2631.8         | 98.245     |
| 8            | 14.69      | 0.08              | 21.4         | 2.2            | 0.082      |
| 9            | 15.20      | 0.13              | 25.3         | 3.5            | 0.130      |
| 10           | 15.67      | 0.07              | 18.4         | 1.8            | 0.067      |
| 11           | 16.45      | 0.17              | 47.2         | 4.5            | 0.169      |
| 12           | 18.80      | 0.09              | 24.9         | 2.5            | 0.095      |
|              |            |                   |              |                |            |
| <b>Total</b> |            | 100.00            | 16105.9      | 2678.9         | 100.000    |

- Compound 28

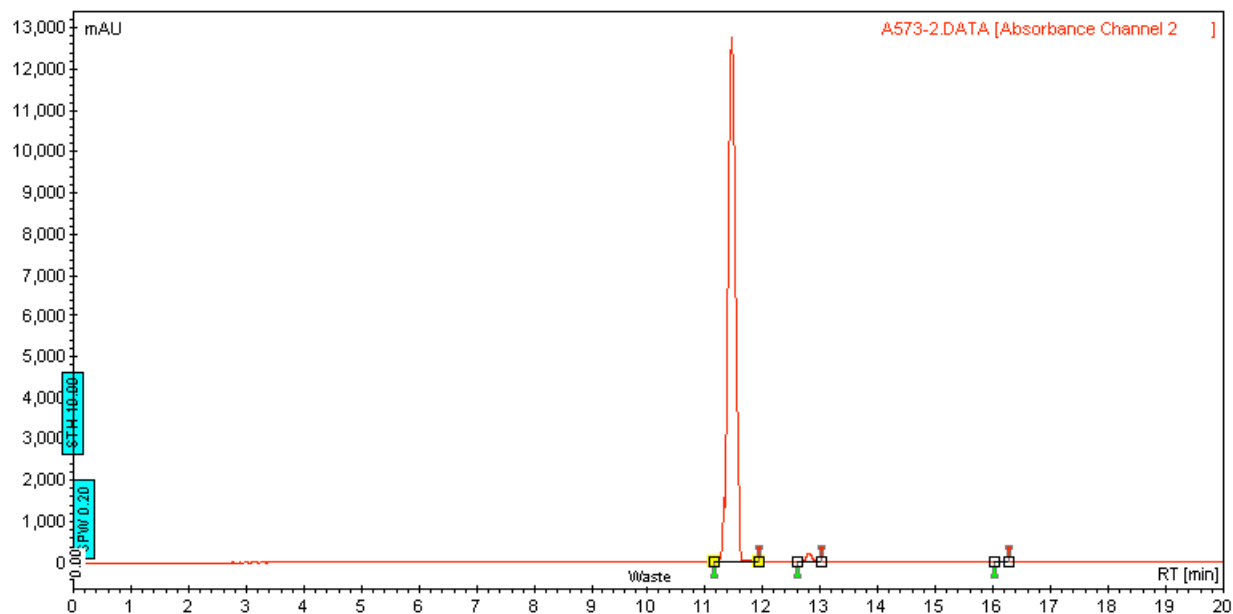

| Index        | Time [Min] | Quantity [% Area] | Height [mAU] | Area [mAU.Min] | Area % [%] |
|--------------|------------|-------------------|--------------|----------------|------------|
| 1            | 11.46      | 98.67             | 12744.7      | 1967.4         | 98.669     |
| 2            | 12.80      | 1.21              | 208.9        | 24.1           | 1.208      |
| 3            | 16.15      | 0.12              | 24.8         | 2.5            | 0.124      |
|              |            |                   |              |                |            |
| <b>Total</b> |            | 100.00            | 12978.5      | 1993.9         | 100.000    |



- Compound 29

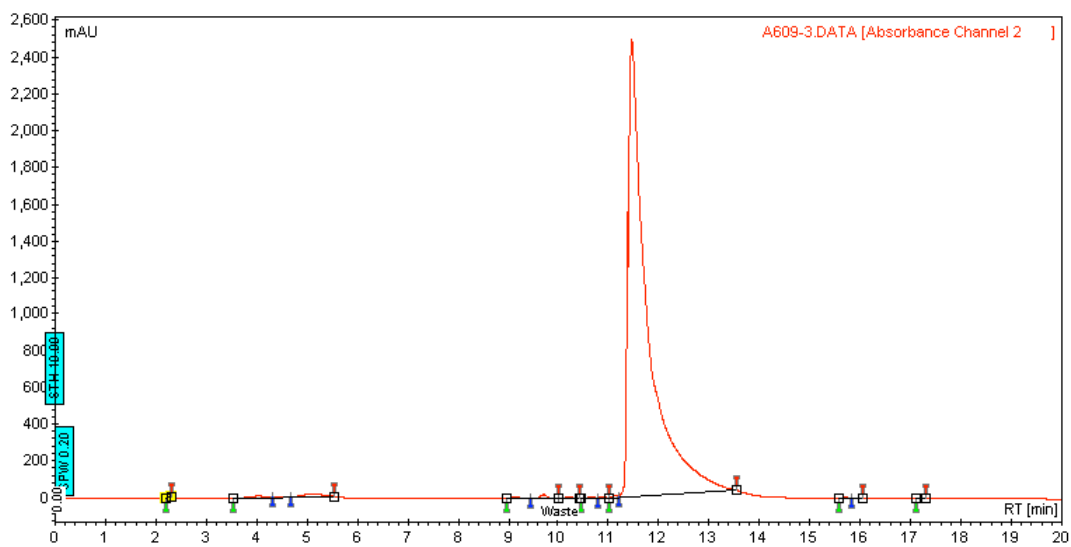

| Index        | Time [Min] | Quantity [% Area] | Height [mAU] | Area [mAU.Min] | Area % [%] |
|--------------|------------|-------------------|--------------|----------------|------------|
| 1            | 2.26       | 0.01              | 1.9          | 0.1            | 0.011      |
| 2            | 4.03       | 0.30              | 10.3         | 3.4            | 0.305      |
| 3            | 4.51       | 0.09              | 4.7          | 1.1            | 0.094      |
| 4            | 5.10       | 0.61              | 14.7         | 6.9            | 0.610      |
| 5            | 9.16       | 0.11              | 7.6          | 1.2            | 0.109      |
| 6            | 9.72       | 0.27              | 19.9         | 3.0            | 0.270      |
| 7            | 10.23      | 0.11              | 8.6          | 1.2            | 0.106      |
| 8            | 10.67      | 0.08              | 6.1          | 0.8            | 0.076      |
| 9            | 10.90      | 0.07              | 7.6          | 0.8            | 0.072      |
| 10           | 11.13      | 0.11              | 12.5         | 1.3            | 0.111      |
| 11           | 11.47      | 98.11             | 2487.1       | 1102.4         | 98.106     |
| 12           | 15.71      | 0.08              | 9.4          | 0.9            | 0.083      |
| 13           | 17.92      | 0.03              | 3.5          | 0.4            | 0.033      |
| 14           | 17.20      | 0.01              | 1.8          | 0.2            | 0.014      |
| <b>Total</b> |            | 100.00            | 2595.7       | 1123.7         | 100.000    |

**Growth Inhibition (MTT) Data for Indolequinone Leaving Groups**

| Compound                | IC <sub>50</sub> (nM) in MIA PaCa-2 Cells |          |
|-------------------------|-------------------------------------------|----------|
|                         | 4 h                                       | 72 h     |
| Phenol                  | 16535±46                                  | 16045±31 |
| 4-Nitrophenol           | 10994±26                                  | 12994±23 |
| 3-Nitrophenol           | 7126±21                                   | 13856±37 |
| 2-Nitrophenol           | 6084±37                                   | 16358±36 |
| 2,4-Dinitrophenol       | 15851±70                                  | 22101±48 |
| 2-Fluoro-4-nitrophenol  | 14290±51                                  | 19198±65 |
| 4-Hydroxypyridine       | 43203±47                                  | 17796±41 |
| 3-Hydroxypyridine       | 56480±39                                  | 73100±45 |
| 2-Hydroxypyridine       | 68137±35                                  | 68804±58 |
| 4-Fluorophenol          | 12385±45                                  | 13164±54 |
| 2,4-Difluorophenol      | 14758±60                                  | 20772±57 |
| 2,4,6-Trifluorophenol   | 36360±68                                  | 38058±57 |
| 4-Trifluoromethylphenol | 13053±82                                  | 32926±59 |
| 4-Cyanophenol           | 56830±49                                  | 73339±57 |
| 4-Aminophenol           | 41979±56                                  | 42250±69 |

**Substituted phenol induced growth inhibition in MIA PaCa-2 cells.**

Growth inhibition was measured using the MTT growth inhibition assay. Cells were treated with drug in complete media continuously for (A) 4 h and (B) 72 h. Results are expressed as mean of 3 independent experiments.
